# Supplementary material
Source: PubMed Central journal article supplement (PMC2048809)
Supplement: plntphys_pp.107.106203_1.pdf [file plntphys_pp.107.106203_1.pdf]

## ONLINE SUPPLEMENT 1:

Oligonucleotide primers for reverse RNA gel blot:

|                  |                                                          |
|------------------|----------------------------------------------------------|
| SSH fw:          | 5' TCGAGCGGCCCGCCCGGGCAGGT 3'                            |
| SSH rev:         | 5' AGCGTGGTCGCGGCCGAGGT 3'                               |
| AY104722 (Actin) | 5' GAGAACTGGCATCACACCTT 3'<br>5' AGCATGAGGAAGTGTGTATC 3' |
| X75326 (G3PDH)   | 5' GCCTGTCTTGTGATTA 3'<br>5' ACGGCAGGTTACAGTG 3'         |

Oligonucleotide primers for qRT-PCR:

|                        |                                                           |
|------------------------|-----------------------------------------------------------|
| BT016828               | 5' CATCTGCCGGTTTAATCATC 3'<br>5' GCAGGGCACTACATCACAA 3'   |
| CB380608               | 5' ACTTGACGGTTGCCTTAGTCT 3'<br>5' ATGCTTTCTTGGCATCAGAG 3' |
| CK827793               | 5' GTATTGCCGGTCTAACGATG 3'<br>5' ATGTTGGTAGCATGCACTCC 3'  |
| BM079363               | 5' GACCTCCTCCATCTTGCTT 3'<br>5' TCTTGTGATGTTGCTGTTCG 3'   |
| BM337329               | 5' CGACCTGCATCGACATCAT 3'<br>5' CCGAGGAAGGTGAGGATAAG 3'   |
| CF062736               | 5' AACATTGTCACCAACCCAAC 3'<br>5' CTGATCGAACAGGGCTTCTA 3'  |
| BT016182               | 5' GAGTCCATGAAGGATGATGC 3'<br>5' TCAATTCAGCCAGGACAAC 3'   |
| CF637826               | 5' CTCTAGAAGTGCCGCGATTG 3'<br>5' GTTCGCAGGTCACCTCGCTT 3'  |
| AI861099               | 5' CTTCCCTTGCCGATAAAGACT 3'<br>5' GAGGGGCAAAGAAGAAGAAG 3' |
| X07156 (GAPDH)         | 5' TCCACTCAAGGGTATCATGG 3'<br>5' GACGAAGTGGTCGTTTCAGAG 3' |
| AF435816 (Thioredoxin) | 5' GGACCAGAAGATTGCAGAAG 3'<br>5' CAGCATAGACAGGAGCAATG 3'  |

**Online supplement 2: Annotated list of pericycle and non-pericycle ESTs**

| Cell-type | db_EST ID | Genbank AC | In house ID | Anchoring                   | AC Function [species]                                                  | Functional category |
|-----------|-----------|------------|-------------|-----------------------------|------------------------------------------------------------------------|---------------------|
| Pericycle | 43580663  | EH211042   | 1_A05_PL-E  | PUT-155a-Zea_mays-76311     | AAP53974.2 Cell division cycle protein 48 [O. sativa]                  | Cell cycle          |
| Pericycle | 43580885  | EH211264   | Peri-Hd09.R | PUT-155a-Zea_mays-52777736  | AAK97227.1 CDK-activating kinase [M. sativa]                           | Cell cycle          |
| Pericycle | 43580561  | EH210940   | 1_A09_PL-A  | PUT-155a-Zea_mays-27329     | BAB16439.1 Replication factor C 36kDa subunit [O. sativa]              | Cell cycle          |
| Pericycle | 43580819  | EH211198   | Peri-G-c7-R | PUT-155a-Zea_mays-12777741  | AAO72572.1 Protein kinase [O. sativa]                                  | Cell cycle          |
| Pericycle | 43580608  | EH210987   | 1_D09_PL-B  | MAGI4_38493                 | BAD17160.1 Cyclin T2-like protein [O. sativa]                          | Cell cycle          |
| Pericycle | 43580837  | EH211216   | Peri-G-e2-R | PUT-155a-Zea_mays-75804     | Q8H6A5 Translationally-controlled tumor protein homolog [Z. mays]      | Cell fate           |
| Pericycle | 43580596  | EH210975   | 1_E06_PL-B  | PUT-155a-Zea_mays-28336     | BAD25014.1 Coatomer protein complex, subunit beta 2 [O. sativa]        | Cell fate           |
| Pericycle | 43580924  | EH211303   | Peri-Hh08.R | PUT-155a-Zea_mays-27763     | BAB92465.1 Senescence-associated protein-like [O. sativa]              | Cell fate           |
| Pericycle | 43580871  | EH211250   | Peri-Hb08.R | PUT-155a-Zea_mays-13502     | O22349 Tubulin alpha-3 [E. indica]                                     | Cell fate           |
| Pericycle | 43580604  | EH210983   | 1_C12_PL-B  | PUT-155a-Zea_mays-83877736  | BAB68268.1 Drought inducible 22 kD protein [S. officinarum]            | Disease/defense     |
| Pericycle | 43580685  | EH211064   | 1_H03_PL-D  | PUT-155a-Zea_mays-74262     | CAA06996.1 Ascorbate peroxidase [H. vulgare]                           | Disease/defense     |
| Pericycle | 43580672  | EH211051   | 1_B04_PL-D  | PUT-155a-Zea_mays-67586     | AAF68389.1 Hypersensitive-induced response protein [Z. mays]           | Disease/defense     |
| Pericycle | 43580766  | EH211145   | PFB-E5      | PUT-155a-Zea_mays-66913     | AAR33048.1 Allene oxide synthase [Z. mays]                             | Disease/defense     |
| Pericycle | 43580621  | EH211000   | 1_A01_PL-C  | PUT-155a-Zea_mays-62856     | CAB38118.1 Glutathione transferase III(a) [Z. mays]                    | Disease/defense     |
| Pericycle | 43580609  | EH210988   | 1_D06_PL-B  | PUT-155a-Zea_mays-62426     | AAM15929.1 Heat shock factor-binding protein 1 [Z. mays]               | Disease/defense     |
| Pericycle | 43580883  | EH211262   | Peri-Hc05.R | PUT-155a-Zea_mays-59377742  | AAW78864.1 Respiratory burst oxidase 2 [M. truncatula]                 | Disease/defense     |
| Pericycle | 43580751  | EH211130   | PFB-C9      | PUT-155a-Zea_mays-49352     | AAN86275.1 Heat shock cognate protein 70 [C. maxima]                   | Disease/defense     |
| Pericycle | 43580865  | EH211244   | Peri-Hb02.R | PUT-155a-Zea_mays-38677742  | CAB59893.1 Glutathione peroxidase-like protein [H. vulgare]            | Disease/defense     |
| Pericycle | 43580625  | EH211004   | 1_G10_PL-B  | PUT-155a-Zea_mays-29853     | CAA06996.1 Ascorbate peroxidase [H. vulgare]                           | Disease/defense     |
| Pericycle | 43580852  | EH211231   | Peri-G-h1-R | PUT-155a-Zea_mays-18210     | AAP46232.1 Heat shock protein [O. sativa]                              | Disease/defense     |
| Pericycle | 43580691  | EH211070   | PF-B12      | PUT-155a-Zea_mays-111977743 | P33126 Heat shock protein 81-1 [O. sativa]                             | Disease/defense     |
| Pericycle | 43580722  | EH211101   | PF-D4       | PUT-155a-Zea_mays-110677738 | BAD73667.1 Heat shock protein 82 [O. sativa]                           | Disease/defense     |
| Pericycle | 43580607  | EH210986   | 1_B04_PL-B  | PUT-155a-Zea_mays-10347     | AAM28296.1 Peroxidase [A. comosus]                                     | Disease/defense     |
| Pericycle | 43580619  | EH210998   | 1_F02_PL-B  | PUT-155a-Zea_mays-10347     | AAM28296.1 Peroxidase [A. comosus]                                     | Disease/defense     |
| Pericycle | 43580850  | EH211229   | Peri-Hb03.R | PUT-155a-Zea_mays-06559     | AAK52085.1 Peroxidase [N. tabacum]                                     | Disease/defense     |
| Pericycle | 43580923  | EH211302   | Peri-Hg09.R | PUT-155a-Zea_mays-046682    | Q9ARD5 Low temperature-induced protein It101.2 [H. vulgare]            | Disease/defense     |
| Pericycle | 43580758  | EH211137   | PFB-E9      | PUT-155a-Zea_mays-017503    | P84637 Cycloviolin-A [L. cymosa]                                       | Disease/defense     |
| Pericycle | 43580553  | EH210932   | 1_F01_PL-A  | -                           | T02955 Cytochrome P450 monooxygenase [Z. mays]                         | Disease/defense     |
| Pericycle | 43580895  | EH211274   | Peri-Hh10.R | PUT-155a-Zea_mays-8497      | CAA83914.1 Phosphoglycerate mutase [Z. mays]                           | Energy              |
| Pericycle | 43580725  | EH211104   | PF-A7       | PUT-155a-Zea_mays-74448     | AAA87580.1 Glyceroldehyde-3-phosphate dehydrogenase GAPC4 [Z. mays]    | Energy              |
| Pericycle | 43580595  | EH210974   | 1_G06_PL-B  | PUT-155a-Zea_mays-74429     | Q09054 Glyceroldehyde-3-phosphate dehydrogenase, cytosolic 2 [Z. mays] | Energy              |
| Pericycle | 43580777  | EH211156   | PFC-A6      | PUT-155a-Zea_mays-71607     | NP_192171.1 Hydrogen-transporting ATP synthase [A. thaliana]           | Energy              |
| Pericycle | 43580649  | EH211028   | 1_H07_PL-C  | PUT-155a-Zea_mays-66025     | AAO1224.1 chlorophyll antenna size regulatory protein [C. reinhardtii] | Energy              |
| Pericycle | 43580563  | EH210942   | 1_B05_PL-A  | PUT-155a-Zea_mays-65577737  | AAL99744.1 Pyruvate decarboxylase [Z. mays]                            | Energy              |
| Pericycle | 43580848  | EH211227   | Peri-Hf09.R | PUT-155a-Zea_mays-60361     | CCZM Cytochrome c [Z. mays]                                            | Energy              |
| Pericycle | 43580825  | EH211204   | Peri-G-d4-R | PUT-155a-Zea_mays-53077740  | AAA33465.1 Glyceroldehyde-3-phosphate dehydrogenase [Z. mays]          | Energy              |
| Pericycle | 43580716  | EH211095   | PF-E12      | PUT-155a-Zea_mays-44764     | NP_195496.1 Cytochrome-c oxidase [A. thaliana]                         | Energy              |
| Pericycle | 43580898  | EH211277   | Peri-He01.R | PUT-155a-Zea_mays-42477742  | ABE79585.1 ETC complex I subunit conserved region [M. truncatula]      | Energy              |
| Pericycle | 43580812  | EH211191   | Peri-G-f2-R | PUT-155a-Zea_mays-31677735  | AAM92706.1 Cytochrome c oxidase subunit [T. aestivum]                  | Energy              |
| Pericycle | 43580922  | EH211301   | Peri-Hg10.R | PUT-155a-Zea_mays-31477738  | CAA53366.1 Cytochrome b5 [O. sativa]                                   | Energy              |
| Pericycle | 43580706  | EH211085   | 1_C01_PL-E  | PUT-155a-Zea_mays-082734    | ABE92785.1 Photosynthetic reaction center, H-chain [M. truncatula]     | Energy              |
| Pericycle | 43580890  | EH211269   | Peri-He08.R | PUT-155a-Zea_mays-017751    | NP_187697.1 Ubiquinol-cytochrome-c reductase [A. thaliana]             | Energy              |
| Pericycle | 43580658  | EH211037   | 1_D02_PL-D  | PUT-155a-Zea_mays-015523    | YP_762510.1 Cytochrome c oxidase subunit 1 [T. dactyloides]            | Energy              |
| Pericycle | 43580593  | EH210972   | 1_H07_PL-A  | PUT-155a-Zea_mays-015523    | YP_762510.1 Cytochrome c oxidase subunit 1 [T. dactyloides]            | Energy              |

| Cell-type | db_EST ID | Genbank AC | In house ID | Anchoring                   | AC Function [species]                                                         | Functional category |
|-----------|-----------|------------|-------------|-----------------------------|-------------------------------------------------------------------------------|---------------------|
| Pericycle | 43580748  | EH211127   | PF-F8       | PUT-155a-Zea_mays-013766    | Q42841 Cytochrome c oxidase polypeptide Vc [H. vulgare]                       | Energy              |
| Pericycle | 43580842  | EH211221   | Peri-G-g6-R | -                           | Q40089 ATP synthase delta' chain [I. batatas]                                 | Energy              |
| Pericycle | 43580720  | EH211099   | PF-D9       | -                           | NP_201477.1 Succinate dehydrogenase1-1 [A. thaliana]                          | Energy              |
| Pericycle | 43580840  | EH211219   | Peri-Hc01.R | PUT-155a-Zea_mays-99077736  | AAQ14869.1 Isopentenyl pyrophosphate isomerase [Z. mays]                      | Metabolism          |
| Pericycle | 43580644  | EH211023   | 1_C01_PL-C  | PUT-155a-Zea_mays-9077737   | ABF50107.1 Nitrilase associated protein-like [M. acuminata]                   | Metabolism          |
| Pericycle | 43580806  | EH211185   | PFC-H4      | PUT-155a-Zea_mays-86777735  | P37833 Aspartate aminotransferase [O. sativa]                                 | Metabolism          |
| Pericycle | 43580863  | EH211242   | Peri-Hb09.R | PUT-155a-Zea_mays-77377739  | O24575 S-adenosylmethionine decarboxylase proenzyme [Z. mays]                 | Metabolism          |
| Pericycle | 43580799  | EH211178   | PFC-H2      | PUT-155a-Zea_mays-71719     | AAO62313.1 UDP-glucose dehydrogenase [C. esculenta]                           | Metabolism          |
| Pericycle | 43580818  | EH211197   | Peri-G-b6-R | PUT-155a-Zea_mays-70462     | NP_193582.2 Hydrolase, acting on ester bonds [A. thaliana]                    | Metabolism          |
| Pericycle | 43580585  | EH210964   | 1_F09_PL-A  | PUT-155a-Zea_mays-68405     | Q08062 Malate dehydrogenase [Z. mays]                                         | Metabolism          |
| Pericycle | 43580726  | EH211105   | PF-B3       | PUT-155a-Zea_mays-677742    | NP_172963.3 CDP-diaclyglycerol-serine O-phosphatidyltransferase [A. thaliana] | Metabolism          |
| Pericycle | 43580868  | EH211247   | Peri-Ha08.R | PUT-155a-Zea_mays-67303     | ABF95474.1 Aspartate aminotransferase [O. sativa]                             | Metabolism          |
| Pericycle | 43580695  | EH211074   | 1_B09_PL-E  | PUT-155a-Zea_mays-66361     | CAA73139.1 Isocitrate dehydrogenase (NADP+) [A. graveolens]                   | Metabolism          |
| Pericycle | 43580568  | EH210947   | 1_D07_PL-A  | PUT-155a-Zea_mays-65877735  | P08440 Fructose-bisphosphate aldolase [Z. mays]                               | Metabolism          |
| Pericycle | 43580909  | EH211288   | Peri-Hf07.R | PUT-155a-Zea_mays-65877735  | P08440 Fructose-bisphosphate aldolase [Z. mays]                               | Metabolism          |
| Pericycle | 43580802  | EH211181   | PFC-F2      | PUT-155a-Zea_mays-6451      | P47917 O-methyltransferase ZRP4 [Z. mays]                                     | Metabolism          |
| Pericycle | 43580877  | EH211256   | Peri-Hc03.R | PUT-155a-Zea_mays-61325     | BAD09640.1 UDP-glucose 4-epimerase [O. sativa]                                | Metabolism          |
| Pericycle | 43580637  | EH211016   | 1_A10_PL-C  | PUT-155a-Zea_mays-59531     | AAX95611.1 Plant-specific FAD-dependent oxidoreductase [O. sativa]            | Metabolism          |
| Pericycle | 43580635  | EH211014   | 1_A12_PL-C  | PUT-155a-Zea_mays-58873     | NP_172684.1 Disulfide oxidoreductase/monooxygenase [A. thaliana]              | Metabolism          |
| Pericycle | 43580622  | EH211001   | 1_C03_PL-C  | PUT-155a-Zea_mays-52177737  | ABB86275.1 Sulfite oxidase-like [S. tuberosum]                                | Metabolism          |
| Pericycle | 43580813  | EH211192   | Peri-G-b7-R | PUT-155a-Zea_mays-50386     | O48556 Soluble inorganic pyrophosphatase [Z. mays]                            | Metabolism          |
| Pericycle | 43580891  | EH211270   | Peri-Hf04.R | PUT-155a-Zea_mays-46297     | BAA94257.1 Endo-1,4-beta-glucanase Cel1 [H. vulgare]                          | Metabolism          |
| Pericycle | 43580712  | EH211091   | PF-A1       | PUT-155a-Zea_mays-30601     | AAO62313.1 UDP-glucose dehydrogenase [C. esculenta]                           | Metabolism          |
| Pericycle | 43580761  | EH211140   | PFB-C1      | PUT-155a-Zea_mays-30601     | AAO62313.1 UDP-glucose dehydrogenase [C. esculenta]                           | Metabolism          |
| Pericycle | 43580867  | EH211246   | Peri-Hd04.R | PUT-155a-Zea_mays-28677744  | CAA74071.1 Cinnamoyl CoA reductase [Z. mays]                                  | Metabolism          |
| Pericycle | 43580639  | EH211018   | 1_G11_PL-B  | PUT-155a-Zea_mays-27979     | Q9SE42 Ribulose-phosphate-3-epimerase [O. sativa]                             | Metabolism          |
| Pericycle | 43580788  | EH211167   | PFC-C7      | PUT-155a-Zea_mays-26557     | AAF37733.1 4-coumarate--CoA ligase 4CL2 [L. perenne]                          | Metabolism          |
| Pericycle | 43580661  | EH211040   | PF-G12      | PUT-155a-Zea_mays-23777737  | ABI95404.1 Fasciclin-like protein FLA14 [T. aestivum]                         | Metabolism          |
| Pericycle | 43580688  | EH211067   | PF-A3       | PUT-155a-Zea_mays-21965     | P47917 O-methyltransferase ZRP4 (OMT) [Z. mays]                               | Metabolism          |
| Pericycle | 43580753  | EH211132   | PFB-E11     | PUT-155a-Zea_mays-16703     | AAX81879.1 Quinone reductase [T. monococcum]                                  | Metabolism          |
| Pericycle | 43580571  | EH210950   | 1_D08_PL-A  | PUT-155a-Zea_mays-15777742  | BAD23582.1 Nicotianamine aminotransferase A [O. sativa]                       | Metabolism          |
| Pericycle | 43580764  | EH211143   | PFB-D8      | PUT-155a-Zea_mays-1522      | ABF98755.1 CBS domain containing protein [O. sativa]                          | Metabolism          |
| Pericycle | 43580728  | EH211107   | PF-E10      | PUT-155a-Zea_mays-14706     | AAT02417.1 Sterol-8,7-isomerase [Z. mays]                                     | Metabolism          |
| Pericycle | 43580569  | EH210948   | 1_C12_PL-A  | PUT-155a-Zea_mays-119477739 | ABE92718.1 IMP dehydrogenase/GMP reductase [M. truncatula]                    | Metabolism          |
| Pericycle | 43580667  | EH211046   | 1_E05_PL-C  | PUT-155a-Zea_mays-109277739 | P93554 Nucleoside diphosphate kinase 1 [S. officinarum]                       | Metabolism          |
| Pericycle | 43580781  | EH211160   | PFC-D2      | PUT-155a-Zea_mays-109277739 | P93554 Nucleoside diphosphate kinase 1 [S. officinarum]                       | Metabolism          |
| Pericycle | 43580703  | EH211082   | PFC-A7      | PUT-155a-Zea_mays-103177742 | AAO72664.1 Adenosylhomocysteinase-like protein [O. sativa]                    | Metabolism          |
| Pericycle | 43580735  | EH211114   | PF-G5       | PUT-155a-Zea_mays-08629     | AAZ05070.1 Glutamate decarboxylase [C. sinensis]                              | Metabolism          |
| Pericycle | 43580775  | EH211154   | Peri-G-b1-R | PUT-155a-Zea_mays-083138    | NP_188995.2 Cyclopropane-fatty-acyl-phospholipid synthase [A. thaliana]       | Metabolism          |
| Pericycle | 43580731  | EH211110   | PF-C3       | PUT-155a-Zea_mays-08180     | BAD21873.1 O-linked N-acetyl glucosamine transferase [O. sativa]              | Metabolism          |
| Pericycle | 43580774  | EH211153   | PFB-F4      | PUT-155a-Zea_mays-014288    | AAG13624.1 Folylpolylglutamate synthetase [O. sativa]                         | Metabolism          |
| Pericycle | 43580638  | EH211017   | 1_G07_PL-B  | PUT-155a-Zea_mays-010227    | NP_180917.1 Cinnamoyl-CoA reductase [A. thaliana]                             | Metabolism          |
| Pericycle | 43580776  | EH211155   | PFC-B3      | MAGI4_79248                 | AAP23035.1 Sphingolipid delta-8 desaturase [P. vialii]                        | Metabolism          |
| Pericycle | 43580592  | EH210971   | 1_A06_PL-B  | MAGI4_128551                | CAJ01704.1 AdoMet synthase 3 [H. vulgare]                                     | Metabolism          |

| Cell-type | db_EST ID | Genbank AC | In house ID | Anchoring                   | AC Function [species]                                                    | Functional category |
|-----------|-----------|------------|-------------|-----------------------------|--------------------------------------------------------------------------|---------------------|
| Pericycle | 43580612  | EH210991   | 1_C05_PL-B  | MAGI4_116767                | AAO72664.1 Adenosylhomocysteinase-like protein [O. sativa]               | Metabolism          |
| Pericycle | 43580611  | EH210990   | 1_B09_PL-B  | contig1                     | P93554 Nucleoside diphosphate kinase 1 [S. officinarum]                  | Metabolism          |
| Pericycle | 43580581  | EH210960   | 1_E01_PL-C  | contig1                     | P93554 Nucleoside diphosphate kinase 1 [S. officinarum]                  | Metabolism          |
| Pericycle | 43580678  | EH211057   | 1_F01_PL-D  | contig1                     | P93554 Nucleoside diphosphate kinase 1 [S. officinarum]                  | Metabolism          |
| Pericycle | 43580843  | EH211222   | Peri-G-f7-R | -                           | AAF72992.1 Germin-like protein 1 [Z. mays]                               | Metabolism          |
| Pericycle | 43580854  | EH211233   | Peri-G-g5-R | -                           | CAC14890.1 d-TDP-glucose dehydratase [P. australis]                      | Metabolism          |
| Pericycle | 43580845  | EH211224   | Peri-G-h3-R | -                           | P42895 2-phosphoglycerate dehydratase 2 [Z. mays]                        | Metabolism          |
| Pericycle | 43580800  | EH211179   | Peri-G-b4-R | -                           | P93554 Nucleoside diphosphate kinase 1 [S. officinarum]                  | Metabolism          |
| Pericycle | 43580826  | EH211205   | Peri-G-d1-R | PUT-155a-Zea_mays-977741    | AAF67099.1 Epsilon-COP [Z. mays]                                         | Protein fate        |
| Pericycle | 43580894  | EH211273   | Peri-Hd06.R | PUT-155a-Zea_mays-97377743  | AAZ20285.1 Ubiquitin fusion protein [A. hypogaea]                        | Protein fate        |
| Pericycle | 43580859  | EH211238   | Peri-Hb11.R | PUT-155a-Zea_mays-89877743  | Q9FR39 Profilin-5 [Z. mays]                                              | Protein fate        |
| Pericycle | 43580632  | EH211011   | 1_F12_PL-B  | PUT-155a-Zea_mays-70920     | AAB88617.1 Ubiquitin conjugating enzyme [Z. mays]                        | Protein fate        |
| Pericycle | 43580780  | EH211159   | Peri-G-a7-R | PUT-155a-Zea_mays-6977737   | O22655 Profilin-4 [Z. mays]                                              | Protein fate        |
| Pericycle | 43580721  | EH211100   | PF-G3       | PUT-155a-Zea_mays-6977737   | O22655 Profilin-4 [Z. mays]                                              | Protein fate        |
| Pericycle | 43580916  | EH211295   | Peri-Hg01.R | PUT-155a-Zea_mays-67477736  | P52427 20S proteasome alpha subunit C [S. oleracea]                      | Protein fate        |
| Pericycle | 43580858  | EH211237   | Peri-Ha05.R | PUT-155a-Zea_mays-49232     | AAU82109.1 Ubiquitin-conjugating enzyme [T. aestivum]                    | Protein fate        |
| Pericycle | 43580580  | EH210959   | 1_A03_PL-B  | PUT-155a-Zea_mays-38142     | ABI31652.1 26S proteasome regulatory particle subunit 12 [C. sinensis]   | Protein fate        |
| Pericycle | 43580925  | EH211304   | Peri-Hh03.R | PUT-155a-Zea_mays-37566     | NP_567717.1 Peptidyl-prolyl cis-trans isomerase [A. thaliana]            | Protein fate        |
| Pericycle | 43580652  | EH211031   | 1_D03_PL-C  | PUT-155a-Zea_mays-31124     | Q10717 Cysteine proteinase 2 precursor [Z. mays]                         | Protein fate        |
| Pericycle | 43580874  | EH211253   | Peri-Hd03.R | PUT-155a-Zea_mays-29977738  | P25866 Ubiquitin-conjugating enzyme E2-17 kDa [T. aestivum]              | Protein fate        |
| Pericycle | 43580671  | EH211050   | 1_E11_PL-C  | PUT-155a-Zea_mays-2706      | BAA09666.1 Cysteine proteinase inhibitor [Z. mays]                       | Protein fate        |
| Pericycle | 43580732  | EH211111   | PF-H1       | PUT-155a-Zea_mays-2706      | BAA09666.1 Cysteine proteinase inhibitor [Z. mays]                       | Protein fate        |
| Pericycle | 43580900  | EH211279   | Peri-Hf05.R | PUT-155a-Zea_mays-203       | AAX09967.1 Protein disulfide isomerase [Z. mays]                         | Protein fate        |
| Pericycle | 43580770  | EH211149   | PFC-G6      | PUT-155a-Zea_mays-16668     | AAV44043.1 Mitochondrial processing peptidase alpha subunit [O. sativa]  | Protein fate        |
| Pericycle | 43580601  | EH210980   | 1_B03_PL-B  | PUT-155a-Zea_mays-112177735 | ABE80601.1 26S proteasome subunit P45 [M. truncatula]                    | Protein fate        |
| Pericycle | 43580602  | EH210981   | 1_A05_PL-B  | PUT-155a-Zea_mays-10491     | NP_177258.3 Ubiquitin-protein ligase [A. thaliana]                       | Protein fate        |
| Pericycle | 43580700  | EH211079   | 1_C06_PL-E  | PUT-155a-Zea_mays-085211    | Q9M4T8 20S proteasome alpha subunit E [G. max]                           | Protein fate        |
| Pericycle | 43580862  | EH211241   | Peri-Ha04.R | PUT-155a-Zea_mays-019150    | AAZ20285.1 Ubiquitin fusion protein [A. hypogaea]                        | Protein fate        |
| Pericycle | 43580908  | EH211287   | Peri-Hh07.R | PUT-155a-Zea_mays-019150    | AAZ20285.1 Ubiquitin fusion protein [A. hypogaea]                        | Protein fate        |
| Pericycle | 43580631  | EH211010   | 1_H06_PL-D  | PUT-155a-Zea_mays-016884    | BAD53980.1 Proteasome activator subunit 4-like [O. sativa]               | Protein fate        |
| Pericycle | 43580681  | EH211060   | 1_A12_PL-E  | MAGI4_29602                 | AAF67099.1 Epsilon-COP [Z. mays]                                         | Protein fate        |
| Pericycle | 43580809  | EH211188   | Peri-G-e8-R | -                           | AAX09965.1 Protein disulfide isomerase [Z. mays]                         | Protein fate        |
| Pericycle | 43580664  | EH211043   | 1_E03_PL-C  | PUT-155a-Zea_mays-93577742  | P46297 40S ribosomal protein S23 [Fragaria x Ananassa]                   | Protein synthesis   |
| Pericycle | 43580875  | EH211254   | Peri-Hc07.R | PUT-155a-Zea_mays-924       | BAA96367.1 Ribosomal protein L27 [P. ginseng]                            | Protein synthesis   |
| Pericycle | 43580603  | EH210982   | 1_C06_PL-B  | PUT-155a-Zea_mays-7680      | NP_191121.1 Translation initiation factor [A. thaliana]                  | Protein synthesis   |
| Pericycle | 43580816  | EH211195   | Peri-G-b2-R | PUT-155a-Zea_mays-7680      | NP_191121.1 Translation initiation factor [A. thaliana]                  | Protein synthesis   |
| Pericycle | 43580620  | EH210999   | 1_F10_PL-B  | PUT-155a-Zea_mays-75790     | ABE80904.1 Ybak/prolyl-tRNA synthetase associated region [M. truncatula] | Protein synthesis   |
| Pericycle | 43580864  | EH211243   | Peri-G-h7-R | PUT-155a-Zea_mays-7562      | Q6YW46 Elongation factor 1-gamma 2 [O. sativa]                           | Protein synthesis   |
| Pericycle | 43580772  | EH211151   | PFB-D5      | PUT-155a-Zea_mays-7562      | Q6YW46 Elongation factor 1-gamma 2 [O. sativa]                           | Protein synthesis   |
| Pericycle | 43580572  | EH210951   | 1_B08_PL-B  | PUT-155a-Zea_mays-75472     | AAL59231.1 Ribosomal protein L35A [Z. mays]                              | Protein synthesis   |
| Pericycle | 43580579  | EH210958   | 1_F04_PL-A  | PUT-155a-Zea_mays-75177738  | AAC98779.1 S-phase-specific ribosomal protein [O. sativa]                | Protein synthesis   |
| Pericycle | 43580575  | EH210954   | 1_D10_PL-B  | PUT-155a-Zea_mays-75095     | ABE90867.1 Ribosomal L18ae protein [M. truncatula]                       | Protein synthesis   |
| Pericycle | 43580723  | EH211102   | 1_H03_PL-E  | PUT-155a-Zea_mays-65077743  | P50888 60S ribosomal protein L24 [H. vulgare]                            | Protein synthesis   |
| Pericycle | 43580912  | EH211291   | Peri-Hf10.R | PUT-155a-Zea_mays-63677741  | AAK92638.1 Putative 40S Ribosomal protein [O. sativa]                    | Protein synthesis   |

| Cell-type | db_EST ID | Genbank AC | In house ID | Anchoring                   | AC Function [species]                                                  | Functional category       |
|-----------|-----------|------------|-------------|-----------------------------|------------------------------------------------------------------------|---------------------------|
| Pericycle | 43580903  | EH211282   | Peri-He10.R | PUT-155a-Zea_mays-57720     | ABA40430.1 Ribosomal protein L27a [S. tuberosum]                       | Protein synthesis         |
| Pericycle | 43580687  | EH211066   | 1_D11_PL-D  | PUT-155a-Zea_mays-4877742   | ABG22329.1 Ribosomal protein L10 containing protein [O. sativa]        | Protein synthesis         |
| Pericycle | 43580757  | EH211136   | PFB-H5      | PUT-155a-Zea_mays-43449     | AAB67831.1 Ribosomal protein S4 [Z. mays]                              | Protein synthesis         |
| Pericycle | 43580717  | EH211096   | 1_F02_PL-E  | PUT-155a-Zea_mays-41677737  | AAK94425.1 60S ribosomal protein L144 [B. rapa]                        | Protein synthesis         |
| Pericycle | 43580588  | EH210967   | 1_A02_PL-B  | PUT-155a-Zea_mays-40577735  | O48557 60S ribosomal protein L17 [Z. mays]                             | Protein synthesis         |
| Pericycle | 43580743  | EH211122   | PF-G10      | PUT-155a-Zea_mays-40577735  | O48557 60S ribosomal protein L17 [Z. mays]                             | Protein synthesis         |
| Pericycle | 43580913  | EH211292   | Peri-Hg07.R | PUT-155a-Zea_mays-32277737  | O48557 60S ribosomal protein L17 [Z. mays]                             | Protein synthesis         |
| Pericycle | 43580689  | EH211068   | 1_F01_PL-E  | PUT-155a-Zea_mays-31394     | CAH55765.1 Ribosomal L32 [O. sativa]                                   | Protein synthesis         |
| Pericycle | 43580665  | EH211044   | PF-F12      | PUT-155a-Zea_mays-2611      | AAF42977.1 Elongation factor 1 alpha [Z. mays]                         | Protein synthesis         |
| Pericycle | 43580590  | EH210969   | 1_H12_PL-A  | PUT-155a-Zea_mays-25977744  | O48558 60S ribosomal protein L30 [Z. mays]                             | Protein synthesis         |
| Pericycle | 43580886  | EH211265   | Peri-Hd08.R | PUT-155a-Zea_mays-2177741   | BAA19798.1 YK426 [O. sativa]                                           | Protein synthesis         |
| Pericycle | 43580876  | EH211255   | Peri-Hf06.R | PUT-155a-Zea_mays-16477742  | AAW34237.1 Ribosomal protein S19 [O. sativa]                           | Protein synthesis         |
| Pericycle | 43580610  | EH210989   | 1_G02_PL-B  | PUT-155a-Zea_mays-13174     | AAW50985.1 Ribosomal protein L18 [T. aestivum]                         | Protein synthesis         |
| Pericycle | 43580701  | EH211080   | PF-C4       | PUT-155a-Zea_mays-12677737  | BAB21002.1 Ribosomal protein S10 [O. sativa]                           | Protein synthesis         |
| Pericycle | 43580693  | EH211072   | 1_A11_PL-E  | PUT-155a-Zea_mays-120277744 | O48557 60S ribosomal protein L17 [Z. mays]                             | Protein synthesis         |
| Pericycle | 43580666  | EH211045   | 1_G03_PL-C  | PUT-155a-Zea_mays-120277744 | O48557 60S ribosomal protein L17 [Z. mays]                             | Protein synthesis         |
| Pericycle | 43580729  | EH211108   | PFB-F3      | PUT-155a-Zea_mays-120277744 | O48557 60S ribosomal protein L17 [Z. mays]                             | Protein synthesis         |
| Pericycle | 43580707  | EH211086   | 1_G03_PL-E  | PUT-155a-Zea_mays-118177736 | O48557 60S ribosomal protein L17 [Z. mays]                             | Protein synthesis         |
| Pericycle | 43580654  | EH211033   | 1_D05_PL-C  | PUT-155a-Zea_mays-115677741 | AAR15081.1 Translational elongation factor 1 subunit beta [P. sativum] | Protein synthesis         |
| Pericycle | 43580692  | EH211071   | 1_F03_PL-D  | PUT-155a-Zea_mays-115677741 | AAR15081.1 Translational elongation factor 1 subunit beta [P. sativum] | Protein synthesis         |
| Pericycle | 43580586  | EH210965   | 1_D02_PL-B  | PUT-155a-Zea_mays-113877740 | BAD82173.1 Ribosomal protein L5 [O. sativa]                            | Protein synthesis         |
| Pericycle | 43580597  | EH210976   | 1_A10_PL-B  | PUT-155a-Zea_mays-105977743 | ABE94025.1 Ribosomal protein L1 [M. truncatula]                        | Protein synthesis         |
| Pericycle | 43580600  | EH210979   | 1_B10_PL-B  | PUT-155a-Zea_mays-105977743 | ABE94025.1 Ribosomal protein L1 [M. truncatula]                        | Protein synthesis         |
| Pericycle | 43580624  | EH211003   | 1_B11_PL-E  | PUT-155a-Zea_mays-100577744 | P45633 60S ribosomal protein L10 [Z. mays]                             | Protein synthesis         |
| Pericycle | 43580574  | EH210953   | 1_E08_PL-A  | PUT-155a-Zea_mays-100377743 | AAB67831.1 Ribosomal protein S4 [Z. mays]                              | Protein synthesis         |
| Pericycle | 43580704  | EH211083   | PFB-E7      | PUT-155a-Zea_mays-057657    | CAA37241.1 Ribosomal protein L2 [Z. mays]                              | Protein synthesis         |
| Pericycle | 43580794  | EH211173   | Peri-G-b3-R | PUT-155a-Zea_mays-056796    | NP_191121.1 Translation initiation factor [A. thaliana]                | Protein synthesis         |
| Pericycle | 43580554  | EH210933   | 1_B11_PL-A  | PUT-155a-Zea_mays-04138     | NP_172256.1 Ribosomal protein S15A [A. thaliana]                       | Protein synthesis         |
| Pericycle | 43580698  | EH211077   | 1_A01_PL-E  | PUT-155a-Zea_mays-018924    | AAL59231.1 Ribosomal protein L35A [Z. mays]                            | Protein synthesis         |
| Pericycle | 43580804  | EH211183   | Peri-G-a2-R | PUT-155a-Zea_mays-018498    | P50888 60S ribosomal protein L24 [H. vulgare]                          | Protein synthesis         |
| Pericycle | 43580696  | EH211075   | 1_G10_PL-E  | PUT-155a-Zea_mays-017388    | CAG47084.1 40S ribosomal protein S9 [C. roseus]                        | Protein synthesis         |
| Pericycle | 43580679  | EH211058   | 1_A10_PL-E  | PUT-155a-Zea_mays-014668    | AAP80858.1 Ribosomal protein L19 [T. aestivum]                         | Protein synthesis         |
| Pericycle | 43580856  | EH211235   | Peri-G-h2-R | MAGI4_94272                 | AAW34236.1 Ribosomal protein S19 [O. sativa]                           | Protein synthesis         |
| Pericycle | 43580576  | EH210955   | 1_E05_PL-A  | MAGI4_83800                 | BAD30897.1 Translation initiation factor 4G [O. sativa]                | Protein synthesis         |
| Pericycle | 43580745  | EH211124   | PF-F11      | MAGI4_5754                  | AAQ62075.1 Ribosomal protein L3 [T. aestivum]                          | Protein synthesis         |
| Pericycle | 43580718  | EH211097   | 1_E11_PL-E  | MAGI4_154385                | AAC78102.1 60S ribosomal protein L21 [O. sativa]                       | Protein synthesis         |
| Pericycle | 43580808  | EH211187   | Peri-G-a3-R | -                           | AAD11459.1 Acidic ribosomal protein P2a-2 [Z. mays]                    | Protein synthesis         |
| Pericycle | 43580790  | EH211169   | Peri-G-a8-R | -                           | O48557 60S ribosomal protein L17 [Z. mays]                             | Protein synthesis         |
| Pericycle | 43580846  | EH211225   | Peri-G-f6-R | -                           | BAD09090.1 60S ribosomal protein L10A [O. sativa]                      | Protein synthesis         |
| Pericycle | 43580905  | EH211284   | Peri-He09.R | -                           | BAD09090.1 60S ribosomal protein L10A [O. sativa]                      | Protein synthesis         |
| Pericycle | 43580824  | EH211203   | Peri-G-d7-R | PUT-155a-Zea_mays-8495      | NP_173184.2 ATP binding / nucleoside diphosphate kinase [A. thaliana]  | Protein w/ bind. function |
| Pericycle | 43580841  | EH211220   | Peri-G-e7-R | PUT-155a-Zea_mays-84177739  | CAA55693.1 Initiator-binding protein [Z. mays]                         | Protein w/ bind. function |
| Pericycle | 43580653  | EH211032   | 1_E07_PL-C  | PUT-155a-Zea_mays-82077737  | BAD09759.1 Signal recognition particle receptor [O. sativa]            | Protein w/ bind. function |
| Pericycle | 43580690  | EH211069   | 1_F12_PL-D  | PUT-155a-Zea_mays-76625     | NP_175056.1 GTP binding [A. thaliana]                                  | Protein w/ bind. function |

| Cell-type | db_EST ID | Genbank AC | In house ID | Anchoring                   | AC Function [species]                                                       | Functional category       |
|-----------|-----------|------------|-------------|-----------------------------|-----------------------------------------------------------------------------|---------------------------|
| Pericycle | 43580803  | EH211182   | Peri-G-c2-R | PUT-155a-Zea_mays-76487     | NP_181471.1 Structural constituent of ribosome [A. thaliana]                | Protein w/ bind. function |
| Pericycle | 43580785  | EH211164   | PFC-F5      | PUT-155a-Zea_mays-76484     | NP_195881.1 Structural constituent of ribosome [A. thaliana]                | Protein w/ bind. function |
| Pericycle | 43580814  | EH211193   | Peri-Ha01.R | PUT-155a-Zea_mays-76251     | P54348 Histone H2B.5 [Z. mays]                                              | Protein w/ bind. function |
| Pericycle | 43580830  | EH211209   | Peri-G-e5-R | PUT-155a-Zea_mays-72296     | CAD56220.1 Ribosomal protein RL5 [C. arietinum]                             | Protein w/ bind. function |
| Pericycle | 43580882  | EH211261   | Peri-Hc04.R | PUT-155a-Zea_mays-72287     | NP_191429.1 Structural constituent of ribosome [A. thaliana]                | Protein w/ bind. function |
| Pericycle | 43580674  | EH211053   | 1_A10_PL-D  | PUT-155a-Zea_mays-66829     | NP_566950.1 Metal ion binding [A. thaliana]                                 | Protein w/ bind. function |
| Pericycle | 43580628  | EH211007   | 1_F06_PL-B  | PUT-155a-Zea_mays-58017     | NP_200750.1 Oxysterol binding [A. thaliana]                                 | Protein w/ bind. function |
| Pericycle | 43580872  | EH211251   | Peri-Hb04.R | PUT-155a-Zea_mays-51166     | NP_194229.1 ATGP4 [A. thaliana]                                             | Protein w/ bind. function |
| Pericycle | 43580617  | EH210996   | 1_H11_PL-B  | PUT-155a-Zea_mays-47008     | Q43312 Histone H2A.7 [T. aestivum]                                          | Protein w/ bind. function |
| Pericycle | 43580699  | EH211078   | PFB-A7      | PUT-155a-Zea_mays-44370     | NP_187956.1 ATP binding / protein binding [A. thaliana]                     | Protein w/ bind. function |
| Pericycle | 43580616  | EH210995   | 1_C07_PL-B  | PUT-155a-Zea_mays-40437     | NP_188119.1 RNA binding / nucleic acid binding [A. thaliana]                | Protein w/ bind. function |
| Pericycle | 43580892  | EH211271   | Peri-He07.R | PUT-155a-Zea_mays-38825     | NP_564870.1 Metal ion binding [A. thaliana]                                 | Protein w/ bind. function |
| Pericycle | 43580878  | EH211257   | Peri-Hc09.R | PUT-155a-Zea_mays-32663     | CAH69231.1 ML domain protein [N. glauca]                                    | Protein w/ bind. function |
| Pericycle | 43580737  | EH211116   | PFB-D1      | PUT-155a-Zea_mays-32663     | CAH69231.1 ML domain protein [N. glauca]                                    | Protein w/ bind. function |
| Pericycle | 43580889  | EH211268   | Peri-Hc10.R | PUT-155a-Zea_mays-3193      | BAB85987.1 Acyl-CoA-binding protein [P. ginseng]                            | Protein w/ bind. function |
| Pericycle | 43580789  | EH211168   | PFC-D6      | PUT-155a-Zea_mays-30106     | NP_196957.1 Nucleotide binding [A. thaliana]                                | Protein w/ bind. function |
| Pericycle | 43580828  | EH211207   | Peri-G-c3-R | PUT-155a-Zea_mays-27386     | ABE82276.1 RNA-binding region RNP-1 (RNA recognition motif) [M. truncatula] | Protein w/ bind. function |
| Pericycle | 43580556  | EH210935   | 1_A12_PL-A  | PUT-155a-Zea_mays-27229     | P40280 Histone H2A [Z. mays]                                                | Protein w/ bind. function |
| Pericycle | 43580564  | EH210943   | 1_D03_PL-A  | PUT-155a-Zea_mays-19780     | Q9XED7 DNA repair protein RAD51B [Z. mays]                                  | Protein w/ bind. function |
| Pericycle | 43580555  | EH210934   | 1_C09_PL-A  | PUT-155a-Zea_mays-109877741 | P27347 DNA-binding protein MNB1B (HMG1-like protein) [Z. mays]              | Protein w/ bind. function |
| Pericycle | 43580851  | EH211230   | Peri-G-f8-R | PUT-155a-Zea_mays-109877741 | P27347 DNA-binding protein MNB1B (HMG1-like protein) [Z. mays]              | Protein w/ bind. function |
| Pericycle | 43580920  | EH211299   | Peri-Hg11.R | PUT-155a-Zea_mays-109877741 | P27347 DNA-binding protein MNB1B (HMG1-like protein) [Z. mays]              | Protein w/ bind. function |
| Pericycle | 43580897  | EH211276   | Peri-Hh01.R | PUT-155a-Zea_mays-109877741 | P27347 DNA-binding protein MNB1B (HMG1-like protein) [Z. mays]              | Protein w/ bind. function |
| Pericycle | 43580921  | EH211300   | Peri-Hh11.R | PUT-155a-Zea_mays-109877741 | P27347 DNA-binding protein MNB1B (HMG1-like protein) [Z. mays]              | Protein w/ bind. function |
| Pericycle | 43580880  | EH211259   | Peri-Hd07.R | PUT-155a-Zea_mays-104377739 | BAD09673.1 Histone H2B.2 [O. sativa]                                        | Protein w/ bind. function |
| Pericycle | 43580686  | EH211065   | PF-C1       | PUT-155a-Zea_mays-050372    | CAH69231.1 ML domain protein [N. glauca]                                    | Protein w/ bind. function |
| Pericycle | 43580655  | EH211034   | 1_B10_PL-C  | PUT-155a-Zea_mays-0393      | BAD67779.1 RNA recognition motif (RRM)-containing protein [O. sativa]       | Protein w/ bind. function |
| Pericycle | 43580750  | EH211129   | PFC-A5      | PUT-155a-Zea_mays-017460    | AAA32655.1 Histone H3 [M. sativa]                                           | Protein w/ bind. function |
| Pericycle | 43580643  | EH211022   | 1_B04_PL-C  | PUT-155a-Zea_mays-015230    | BAB20761.1 UV-damaged DNA binding protein [O. sativa]                       | Protein w/ bind. function |
| Pericycle | 43580677  | EH211056   | 1_D04_PL-D  | PUT-155a-Zea_mays-011703    | NP_194849.2 DNA binding / DNA topoisomerase [A. thaliana]                   | Protein w/ bind. function |
| Pericycle | 43580618  | EH210997   | 1_D07_PL-B  | MAGI4_105497                | P45633 60S ribosomal protein L10 [Z. mays]                                  | Protein w/ bind. function |
| Pericycle | 43580645  | EH211024   | 1_B09_PL-C  | PUT-155a-Zea_mays-92477736  | AA24685.1 Protein phosphatase 2A regulatory subunit A [Z. mays]             | Signal transduction       |
| Pericycle | 43580782  | EH211161   | PFB-H1      | PUT-155a-Zea_mays-71025     | CAA46150.1 Calmodulin [O. sativa]                                           | Signal transduction       |
| Pericycle | 43580741  | EH211120   | PF-G1       | PUT-155a-Zea_mays-71025     | CAA46150.1 Calmodulin [O. sativa]                                           | Signal transduction       |
| Pericycle | 43580749  | EH211128   | PFB-B211    | PUT-155a-Zea_mays-69014     | ABA61130.1 Light-induced protein 1-like [L. perenne]                        | Signal transduction       |
| Pericycle | 43580676  | EH211055   | 1_H05_PL-C  | PUT-155a-Zea_mays-68664     | CAA46150.1 Calmodulin [O. sativa]                                           | Signal transduction       |
| Pericycle | 43580724  | EH211103   | PF-E4       | PUT-155a-Zea_mays-67877743  | ABE88784.1 SH3 [M. truncatula]                                              | Signal transduction       |
| Pericycle | 43580646  | EH211025   | 1_A04_PL-C  | PUT-155a-Zea_mays-54373     | AAB28535.1 Ras-related GTP binding protein [O. sativa]                      | Signal transduction       |
| Pericycle | 43580817  | EH211196   | Peri-Ha11.R | PUT-155a-Zea_mays-32877744  | ABB90550.1 Steroid membrane binding protein [T. aestivum]                   | Signal transduction       |
| Pericycle | 43580651  | EH211030   | 1_C04_PL-C  | PUT-155a-Zea_mays-16533     | AAL30396.1 Small Ras-related GTP-binding protein [T. aestivum]              | Signal transduction       |
| Pericycle | 43580771  | EH211150   | PFB-F11     | PUT-155a-Zea_mays-126977742 | Q75GB1 Auxin-responsive protein IAA17 [O. sativa]                           | Signal transduction       |
| Pericycle | 43580642  | EH211021   | 1_G09_PL-C  | PUT-155a-Zea_mays-112277735 | AAQ63461.1 Calmodulin 4 [D. carota]                                         | Signal transduction       |
| Pericycle | 43580754  | EH211133   | PFB-F1      | PUT-155a-Zea_mays-014530    | AAC32204.1 Protein phosphatase 2A 55 kDa B regulatory subunit [O. sativa]   | Signal transduction       |
| Pericycle | 43580577  | EH210956   | 1_H06_PL-A  | MAGI4_87970                 | ABG73621.1 Leucine-rich repeat receptor-like kinase [P. tomentosa]          | Signal transduction       |

| Cell-type | db_EST ID | Genbank AC | In house ID | Anchoring                   | AC Function [species]                                                          | Functional category |
|-----------|-----------|------------|-------------|-----------------------------|--------------------------------------------------------------------------------|---------------------|
| Pericycle | 43580831  | EH211210   | Peri-G-d3-R | MAGI4_21112                 | AAP68887.1 Receptor-like protein kinase 1 [O. sativa]                          | Signal transduction |
| Pericycle | 43580823  | EH211202   | Peri-G-b8-R | MAGI4_126108                | AAX31386.1 Calmodulin [A. corniculatum]                                        | Signal transduction |
| Pericycle | 43580614  | EH210993   | 1_F09_PL-B  | MAGI4_11107                 | AAT06576.1 Putative ras-like small GTP binding ptein [Z. mays]                 | Signal transduction |
| Pericycle | 43580684  | EH211063   | 1_D06_PL-D  | PUT-155a-Zea_mays-99077735  | AAK28403.1 Transcription factor APFI [A. thaliana]                             | Transcription       |
| Pericycle | 43580888  | EH211267   | Peri-Hd02.R | PUT-155a-Zea_mays-72850     | AAX14637.1 Zinc finger protein [Z. mays]                                       | Transcription       |
| Pericycle | 43580705  | EH211084   | 1_C11_PL-E  | PUT-155a-Zea_mays-72850     | AAX14637.1 Zinc finger protein [Z. mays]                                       | Transcription       |
| Pericycle | 43580669  | EH211048   | PF-F5       | PUT-155a-Zea_mays-63255     | BAD82068.1 Transcription initiation factor IIF beta subunit [O. sativa]        | Transcription       |
| Pericycle | 43580560  | EH210939   | 1_E03_PL-A  | PUT-155a-Zea_mays-50795     | BAD72339.1 TA9 protein-like [O. sativa]                                        | Transcription       |
| Pericycle | 43580792  | EH211171   | PFC-B7      | PUT-155a-Zea_mays-48777742  | ABF99925.1 NAC domain containing protein [O. sativa]                           | Transcription       |
| Pericycle | 43580694  | EH211073   | 1_D03_PL-E  | PUT-155a-Zea_mays-35977744  | NP_188271.1 Phytochrom associated protein1, transcription factor [A. thaliana] | Transcription       |
| Pericycle | 43580869  | EH211248   | Peri-Hc06.R | PUT-155a-Zea_mays-22377740  | AAU29336.1 ASF/SF2-like pre-mRNA splicing factor SRP31" [Z. mays]              | Transcription       |
| Pericycle | 43580752  | EH211131   | PFB-D4      | PUT-155a-Zea_mays-20743     | AAT42128.1 Zinc finger protein ZF2 [Z. mays]                                   | Transcription       |
| Pericycle | 43580879  | EH211258   | Peri-Hb10.R | PUT-155a-Zea_mays-128077735 | AAB97367.1 Harpin induced gene 1 homolog [O. sativa]                           | Transcription       |
| Pericycle | 43580902  | EH211281   | Peri-He02.R | PUT-155a-Zea_mays-125077742 | BAD53990.1 Zinc-finger protein [O. sativa]                                     | Transcription       |
| Pericycle | 43580906  | EH211285   | Peri-Hf08.R | PUT-155a-Zea_mays-119677738 | AAS20975.1 Mago nashi-like protein [H. orientalis]                             | Transcription       |
| Pericycle | 43580926  | EH211305   | Peri-Hh04.R | PUT-155a-Zea_mays-085763    | Q9LEF5 FACT complex subunit SSRP1 [Z. mays]                                    | Transcription       |
| Pericycle | 43580915  | EH211294   | Peri-Hg04.R | PUT-155a-Zea_mays-013416    | ABE84579.1 Zinc finger protein [M. truncatula]                                 | Transcription       |
| Pericycle | 43580762  | EH211141   | PFB-E3      | PUT-155a-Zea_mays-010987    | NP_196487.1 DNA binding / transcription coactivator [A. thaliana]              | Transcription       |
| Pericycle | 43580849  | EH211228   | Peri-G-f4-R | -                           | P42554 DNA-binding protein S1FA [Z. mays]                                      | Transcription       |
| Pericycle | 43580633  | EH211012   | 1_H06_PL-B  | PUT-155a-Zea_mays-9865      | NP_565968.1 Protein translocase/ protein transporter [A. thaliana]             | Transport           |
| Pericycle | 43580565  | EH210944   | 1_B10_PL-A  | PUT-155a-Zea_mays-9857      | NP_565239.1 Amino acid permease [A. thaliana]                                  | Transport           |
| Pericycle | 43580734  | EH211113   | PF-H4       | PUT-155a-Zea_mays-98377743  | AAK26758.1 Plasma membrane integral protein ZmPIP2-1 [Z. mays]                 | Transport           |
| Pericycle | 43580709  | EH211088   | 1_C09_PL-E  | PUT-155a-Zea_mays-97177736  | AAD29676.1 Plasma membrane MIP protein [Z. mays]                               | Transport           |
| Pericycle | 43580662  | EH211041   | 1_F08_PL-D  | PUT-155a-Zea_mays-75443     | BAA31583.1 Mitochondrial phosphate transporter [Z. mays]                       | Transport           |
| Pericycle | 43580623  | EH211002   | 1_D12_PL-B  | PUT-155a-Zea_mays-64677739  | ABE79815.1 Ankyrin [M. truncatula]                                             | Transport           |
| Pericycle | 43580904  | EH211283   | Peri-He11.R | PUT-155a-Zea_mays-4050      | BAA92904.1 Importin-alpha re-exporter [O. sativa]                              | Transport           |
| Pericycle | 43580634  | EH211013   | 1_G04_PL-B  | PUT-155a-Zea_mays-34786     | BAD82580.1 Ankyrin-like protein [O. sativa]                                    | Transport           |
| Pericycle | 43580557  | EH210936   | 1_F02_PL-A  | PUT-155a-Zea_mays-34389     | NP_566909.1 Protein translocase [A. thaliana]                                  | Transport           |
| Pericycle | 43580591  | EH210970   | 1_H10_PL-A  | PUT-155a-Zea_mays-29616     | AAM61568.1 ABC transporter ATPase [A. thaliana]                                | Transport           |
| Pericycle | 43580715  | EH211094   | 1_E06_PL-E  | PUT-155a-Zea_mays-2277740   | BAB86179.1 Mitochondrial import receptor subunit TOM20 [O. sativa]             | Transport           |
| Pericycle | 43580760  | EH211139   | PFB-G1      | PUT-155a-Zea_mays-105377735 | CAD29313.1 Plasma membrane H <sup>+</sup> -ATPase [O. sativa]                  | Transport           |
| Pericycle | 43580730  | EH211109   | PF-E1       | PUT-155a-Zea_mays-105377735 | CAD29313.1 Plasma membrane H <sup>+</sup> -ATPase [O. sativa]                  | Transport           |
| Pericycle | 43580675  | EH211054   | 1_C11_PL-D  | PUT-155a-Zea_mays-10232     | BAA88950.1 Importin alpha 1b [O. sativa]                                       | Transport           |
| Pericycle | 43580787  | EH211166   | PFC-E6      | PUT-155a-Zea_mays-09706     | AAP13001.1 Sec63 domain containing protein [O. sativa]                         | Transport           |
| Pericycle | 43580884  | EH211263   | Peri-Hc11.R | PUT-155a-Zea_mays-032366    | CAD59565.1 PDR-like ABC transporter [O. sativa]                                | Transport           |
| Pericycle | 43580711  | EH211090   | PF-D11      | PUT-155a-Zea_mays-016666    | NP_197190.1 Protein transporter [A. thaliana]                                  | Transport           |
| Pericycle | 43580599  | EH210978   | 1_A04_PL-B  | MAGI4_115638                | YP_762500.1 ATPase subunit 1 [T. dactyloides]                                  | Transport           |
| Pericycle | 43580670  | EH211049   | 1_H09_PL-C  | MAGI4_3878                  | ABF94843.1 Retrotransposon protein [O. sativa]                                 | Transposon          |
| Pericycle | 43580873  | EH211252   | Peri-Hc08.R | PUT-155a-Zea_mays-75903     | ABA40467.1 Glycoprotein-like protein [S. tuberosum]                            | Unknown             |
| Pericycle | 43580768  | EH211147   | PFB-F8      | PUT-155a-Zea_mays-75043     | No database hit                                                                | Unknown             |
| Pericycle | 43580636  | EH211015   | 1_A08_PL-C  | PUT-155a-Zea_mays-72490     | BAD22765.1 Glycoprotein [B. inermis]                                           | Unknown             |
| Pericycle | 43580587  | EH210966   | 1_G02_PL-A  | PUT-155a-Zea_mays-72490     | BAD22765.1 Glycoprotein [B. inermis]                                           | Unknown             |
| Pericycle | 43580838  | EH211217   | Peri-Ha06.R | PUT-155a-Zea_mays-71310     | NP_192181.2 Unknown function [A. thaliana]                                     | Unknown             |
| Pericycle | 43580778  | EH211157   | PFB-F5      | PUT-155a-Zea_mays-71310     | NP_192181.2 Unknown function [A. thaliana]                                     | Unknown             |

| Cell-type | db_EST ID | Genbank AC | In house ID | Anchoring                   | AC Function [species]                                      | Functional category |
|-----------|-----------|------------|-------------|-----------------------------|------------------------------------------------------------|---------------------|
| Pericycle | 43580844  | EH211223   | Peri-Ha02.R | PUT-155a-Zea_mays-68763     | AAN05005.1 Hypothetical protein [O. sativa]                | Unknown             |
| Pericycle | 43580562  | EH210941   | 1_A05_PL-A  | PUT-155a-Zea_mays-68477739  | AAP44613.1 Unknown protein [O. sativa]                     | Unknown             |
| Pericycle | 43580566  | EH210945   | 1_A08_PL-A  | PUT-155a-Zea_mays-67477742  | NP_001050282.1 Unknown function [O. sativa]                | Unknown             |
| Pericycle | 43580606  | EH210985   | PF-D6       | PUT-155a-Zea_mays-65126     | NP_001045886.1 Unknown function [O. sativa]                | Unknown             |
| Pericycle | 43580742  | EH211121   | PF-E11      | PUT-155a-Zea_mays-63777743  | CAJ86171.1 Unknown function [O. sativa]                    | Unknown             |
| Pericycle | 43580870  | EH211249   | Peri-Hb07.R | PUT-155a-Zea_mays-62634     | NP_001042756.1 Unknown function [O. sativa]                | Unknown             |
| Pericycle | 43580765  | EH211144   | PFB-A9      | PUT-155a-Zea_mays-61671     | CAE03431.1 Unknown function [O. sativa]                    | Unknown             |
| Pericycle | 43580767  | EH211146   | PFB-B7      | PUT-155a-Zea_mays-59677740  | No database hit                                            | Unknown             |
| Pericycle | 43580795  | EH211174   | Peri-G-c6-R | PUT-155a-Zea_mays-56375     | No database hit                                            | Unknown             |
| Pericycle | 43580647  | EH211026   | 1_E04_PL-C  | PUT-155a-Zea_mays-52309     | ABD32900.1 Unknown function [M. truncatula]                | Unknown             |
| Pericycle | 43580736  | EH211115   | PF-D5       | PUT-155a-Zea_mays-51850     | NP_001056192.1 Unknown function [O. sativa]                | Unknown             |
| Pericycle | 43580740  | EH211119   | PF-H8       | PUT-155a-Zea_mays-46213     | NP_001044578.1 Unknown function [O. sativa]                | Unknown             |
| Pericycle | 43580855  | EH211234   | Peri-Ha09.R | PUT-155a-Zea_mays-46071     | NP_001042157.1 Unknown function [O. sativa]                | Unknown             |
| Pericycle | 43580793  | EH211172   | PFC-E2      | PUT-155a-Zea_mays-45277742  | No database hit                                            | Unknown             |
| Pericycle | 43580796  | EH211175   | Peri-G-e4-R | PUT-155a-Zea_mays-43730     | NP_001045981.1 Unknown function [O. sativa]                | Unknown             |
| Pericycle | 43580821  | EH211200   | Peri-G-c8-R | PUT-155a-Zea_mays-40243     | No database hit                                            | Unknown             |
| Pericycle | 43580551  | EH210930   | 1_A04_PL-A  | PUT-155a-Zea_mays-40241     | No database hit                                            | Unknown             |
| Pericycle | 43580801  | EH211180   | Peri-G-g1-R | PUT-155a-Zea_mays-40241     | No database hit                                            | Unknown             |
| Pericycle | 43580881  | EH211260   | Peri-He06.R | PUT-155a-Zea_mays-40240     | YP_173374.1 Unknown function [N. tabacum]                  | Unknown             |
| Pericycle | 43580714  | EH211093   | 1_E02_PL-E  | PUT-155a-Zea_mays-39172     | NP_001050318.1 Unknown function [O. sativa]                | Unknown             |
| Pericycle | 43580594  | EH210973   | 1_C04_PL-B  | PUT-155a-Zea_mays-3779      | [NP_001051319.1] Unknown function [O. sativa]              | Unknown             |
| Pericycle | 43580627  | EH211006   | 1_E10_PL-B  | PUT-155a-Zea_mays-35511     | NP_001043744.1 Unknown function [O. sativa]                | Unknown             |
| Pericycle | 43580584  | EH210963   | 1_H05_PL-A  | PUT-155a-Zea_mays-354       | NP_001046996.1 Unknown function [O. sativa]                | Unknown             |
| Pericycle | 43580659  | EH211038   | 1_C11_PL-C  | PUT-155a-Zea_mays-33377736  | NP_001050926.1 Unknown function [O. sativa]                | Unknown             |
| Pericycle | 43580917  | EH211296   | Peri-Hh09.R | PUT-155a-Zea_mays-33377736  | NP_001050926.1 Unknown function [O. sativa]                | Unknown             |
| Pericycle | 43580660  | EH211039   | 1_E09_PL-C  | PUT-155a-Zea_mays-30777743  | NP_001053477.1 Unknown protein [O. sativa]                 | Unknown             |
| Pericycle | 43580744  | EH211123   | PFB-E4      | PUT-155a-Zea_mays-28694     | NP_001050930.1 Unknown function [O. sativa]                | Unknown             |
| Pericycle | 43580911  | EH211290   | Peri-Hg08.R | PUT-155a-Zea_mays-270       | NP_001058183.1 Unknown function [O. sativa]                | Unknown             |
| Pericycle | 43580918  | EH211297   | Peri-Hh05.R | PUT-155a-Zea_mays-2294      | No database hit                                            | Unknown             |
| Pericycle | 43580834  | EH211213   | Peri-Hg02.R | PUT-155a-Zea_mays-22880     | NP_001048002.1 Unknown function [O. sativa]                | Unknown             |
| Pericycle | 43580866  | EH211245   | Peri-Hb06.R | PUT-155a-Zea_mays-19179     | BAD35349.1 FKBP12 interacting protein [O. sativa]          | Unknown             |
| Pericycle | 43580582  | EH210961   | 1_F03_PL-A  | PUT-155a-Zea_mays-17568     | NP_001041912.1 Unknown function [O. sativa]                | Unknown             |
| Pericycle | 43580570  | EH210949   | 1_C08_PL-B  | PUT-155a-Zea_mays-15177736  | Q40784 Putative apospory-associated protein C [P. ciliare] | Unknown             |
| Pericycle | 43580673  | EH211052   | 1_C04_PL-D  | PUT-155a-Zea_mays-126577737 | No database hit                                            | Unknown             |
| Pericycle | 43580919  | EH211298   | Peri-Hh02.R | PUT-155a-Zea_mays-126577737 | No database hit                                            | Unknown             |
| Pericycle | 43580786  | EH211165   | PFB-H12     | PUT-155a-Zea_mays-126577737 | No database hit                                            | Unknown             |
| Pericycle | 43580791  | EH211170   | PFC-B6      | PUT-155a-Zea_mays-12371     | NP_001046657.1 Unknown function [O. sativa]                | Unknown             |
| Pericycle | 43580630  | EH211009   | 1_G08_PL-B  | PUT-155a-Zea_mays-117677743 | NP_001057280.1 Unknown function [O. sativa]                | Unknown             |
| Pericycle | 43580769  | EH211148   | PFB-G5      | PUT-155a-Zea_mays-117677743 | NP_001057280.1 Unknown function [O. sativa]                | Unknown             |
| Pericycle | 43580713  | EH211092   | 1_E07_PL-E  | PUT-155a-Zea_mays-114477737 | No database hit                                            | Unknown             |
| Pericycle | 43580815  | EH211194   | Peri-G-b5-R | PUT-155a-Zea_mays-112577736 | BAD07966.1 Membrane related protein CP5 [O. sativa]        | Unknown             |
| Pericycle | 43580589  | EH210968   | 1_H02_PL-A  | PUT-155a-Zea_mays-111577744 | NP_001067006.1 Unknown function [O. sativa]                | Unknown             |
| Pericycle | 43580559  | EH210938   | 1_B04_PL-A  | PUT-155a-Zea_mays-111477743 | No database hit                                            | Unknown             |
| Pericycle | 43580861  | EH211240   | Peri-Hb01.R | PUT-155a-Zea_mays-111477743 | No database hit                                            | Unknown             |



| Cell-type | db_EST ID | Genbank AC | In house ID | Anchoring                | AC Function [species]                         | Functional category |
|-----------|-----------|------------|-------------|--------------------------|-----------------------------------------------|---------------------|
| Pericycle | 43580710  | EH211089   | PF-C6       | PUT-155a-Zea_mays-090948 | No database hit                               | Unknown             |
| Pericycle | 43580747  | EH211126   | PFB-A11     | PUT-155a-Zea_mays-087440 | BAD53240.1 Hypothetical protein [O. sativa]   | Unknown             |
| Pericycle | 43580907  | EH211286   | Peri-Hf03.R | PUT-155a-Zea_mays-07346  | NP_001042646.1 Unknown function [O. sativa]   | Unknown             |
| Pericycle | 43580650  | EH211029   | 1_F03_PL-C  | PUT-155a-Zea_mays-07319  | NP_001066929.1 Unknown function [O. sativa]   | Unknown             |
| Pericycle | 43580657  | EH211036   | 1_A08_PL-D  | PUT-155a-Zea_mays-0701   | No database hit                               | Unknown             |
| Pericycle | 43580719  | EH211098   | 1_G08_PL-E  | PUT-155a-Zea_mays-06842  | NP_001051800.1 Unknown function [O. sativa]   | Unknown             |
| Pericycle | 43580683  | EH211062   | PF-E6       | PUT-155a-Zea_mays-06630  | No database hit                               | Unknown             |
| Pericycle | 43580755  | EH211134   | PFC-G1      | PUT-155a-Zea_mays-063554 | No database hit                               | Unknown             |
| Pericycle | 43580756  | EH211135   | PFB-C3      | PUT-155a-Zea_mays-05657  | No database hit                               | Unknown             |
| Pericycle | 43580613  | EH210992   | 1_E02_PL-B  | PUT-155a-Zea_mays-05221  | No database hit                               | Unknown             |
| Pericycle | 43580615  | EH210994   | 1_C11_PL-B  | PUT-155a-Zea_mays-04176  | No database hit                               | Unknown             |
| Pericycle | 43580927  | EH211306   | Peri-Hh06.R | PUT-155a-Zea_mays-03841  | NP_001043640.1 Unknown function [O. sativa]   | Unknown             |
| Pericycle | 43580641  | EH211020   | 1_A03_PL-C  | PUT-155a-Zea_mays-03195  | NP_001060636.1 Unknown function [O. sativa]   | Unknown             |
| Pericycle | 43580798  | EH211177   | Peri-G-c1-R | PUT-155a-Zea_mays-030503 | No database hit                               | Unknown             |
| Pericycle | 43580629  | EH211008   | 1_H09_PL-B  | PUT-155a-Zea_mays-02802  | CAE03449.1 Unknown function [O. sativa]       | Unknown             |
| Pericycle | 43580697  | EH211076   | 1_A08_PL-E  | PUT-155a-Zea_mays-02420  | No database hit                               | Unknown             |
| Pericycle | 43580763  | EH211142   | PFC-B1      | PUT-155a-Zea_mays-020773 | ZP_01633157.1 Unknown function [C. difficile] | Unknown             |
| Pericycle | 43580773  | EH211152   | PFC-C2      | PUT-155a-Zea_mays-019635 | NP_001065314.1 Unknown function [O. sativa]   | Unknown             |
| Pericycle | 43580648  | EH211027   | 1_A09_PL-C  | PUT-155a-Zea_mays-018281 | BAD22765.1 Glycoprotein [B. inermis]          | Unknown             |
| Pericycle | 43580567  | EH210946   | 1_B01_PL-A  | PUT-155a-Zea_mays-018281 | BAD22765.1 Glycoprotein [B. inermis]          | Unknown             |
| Pericycle | 43580836  | EH211215   | Peri-Ha07.R | PUT-155a-Zea_mays-017288 | No database hit                               | Unknown             |
| Pericycle | 43580552  | EH210931   | 1_G06_PL-A  | PUT-155a-Zea_mays-017072 | BAD44882.1 Unknown function [O. sativa]       | Unknown             |
| Pericycle | 43580656  | EH211035   | 1_H01_PL-C  | PUT-155a-Zea_mays-017072 | BAD44882.1 Unknown function [O. sativa]       | Unknown             |
| Pericycle | 43580578  | EH210957   | 1_G08_PL-A  | PUT-155a-Zea_mays-016373 | AAM93675.1 Glycine-rich protein [O. sativa]   | Unknown             |
| Pericycle | 43580668  | EH211047   | 1_D08_PL-D  | PUT-155a-Zea_mays-015723 | NP_001043744.1 Unknown [O. sativa]            | Unknown             |
| Pericycle | 43580797  | EH211176   | PFC-F6      | PUT-155a-Zea_mays-014124 | NP_001048570.1 Unknown function [O. sativa]   | Unknown             |
| Pericycle | 43580805  | EH211184   | PFC-H3      | PUT-155a-Zea_mays-013439 | NP_176022.2 Unknown function [A. thaliana]    | Unknown             |
| Pericycle | 43580605  | EH210984   | 1_A08_PL-B  | PUT-155a-Zea_mays-011608 | NP_001064627.1 Unknown function [O. sativa]   | Unknown             |
| Pericycle | 43580573  | EH210952   | 1_B06_PL-B  | PUT-155a-Zea_mays-011507 | NP_001043982.1 Unknown function [O. sativa]   | Unknown             |
| Pericycle | 43580860  | EH211239   | Peri-Ha03.R | PUT-155a-Zea_mays-011463 | No database hit                               | Unknown             |
| Pericycle | 43580583  | EH210962   | 1_F07_PL-A  | PUT-155a-Zea_mays-01051  | AAK52550.1 Unknown protein [O. sativa]        | Unknown             |
| Pericycle | 43580893  | EH211272   | Peri-Hd10.R | MAGI4_35862              | No database hit                               | Unknown             |
| Pericycle | 43580738  | EH211117   | PF-G9       | MAGI4_35862              | No database hit                               | Unknown             |
| Pericycle | 43580899  | EH211278   | Peri-Hd11.R | MAGI4_29603              | No database hit                               | Unknown             |
| Pericycle | 43580682  | EH211061   | 1_B02_PL-E  | MAGI4_137119             | No database hit                               | Unknown             |
| Pericycle | 43580626  | EH211005   | 1_B12_PL-C  | MAGI4_123659             | No database hit                               | Unknown             |
| Pericycle | 43580708  | EH211087   | 1_H11_PL-E  | contig2                  | No database hit                               | Unknown             |
| Pericycle | 43580910  | EH211289   | Peri-Hf11.R | contig2                  | No database hit                               | Unknown             |
| Pericycle | 43580733  | EH211112   | PF-D2       | -                        | AAN77150.1 Fiber protein Fb11 [G. barbadense] | Unknown             |
| Pericycle | 43580598  | EH210977   | 1_A01_PL-B  | -                        | No database hit                               | Unknown             |
| Pericycle | 43580558  | EH210937   | 1_E09_PL-A  | -                        | No database hit                               | Unknown             |
| Pericycle | 43580680  | EH211059   | 1_F09_PL-D  | -                        | No database hit                               | Unknown             |
| Pericycle | 43580640  | EH211019   | 1_H04_PL-B  | -                        | No database hit                               | Unknown             |
| Pericycle | 43580739  | EH211118   | Peri-G-a1-R | -                        | No database hit                               | Unknown             |

| Cell-type     | db_EST ID | Genbank AC | In house ID | Anchoring                  | AC Function [species]                                               | Functional category |
|---------------|-----------|------------|-------------|----------------------------|---------------------------------------------------------------------|---------------------|
| Pericycle     | 43580811  | EH211190   | Peri-G-a4-R | -                          | No database hit                                                     | Unknown             |
| Pericycle     | 43580810  | EH211189   | Peri-G-a6-R | -                          | No database hit                                                     | Unknown             |
| Pericycle     | 43580807  | EH211186   | Peri-G-c4-R | -                          | NP_001044987.1 Unknown function [O. sativa]                         | Unknown             |
| Pericycle     | 43580829  | EH211208   | Peri-G-c5-R | -                          | No database hit                                                     | Unknown             |
| Pericycle     | 43580832  | EH211211   | Peri-G-d5-R | -                          | No database hit                                                     | Unknown             |
| Pericycle     | 43580833  | EH211212   | Peri-G-d8-R | -                          | No database hit                                                     | Unknown             |
| Pericycle     | 43580835  | EH211214   | Peri-G-e3-R | -                          | NP_001047467.1 Unknown function [O. sativa]                         | Unknown             |
| Pericycle     | 43580822  | EH211201   | Peri-G-e6-R | -                          | No database hit                                                     | Unknown             |
| Pericycle     | 43580839  | EH211218   | Peri-G-f1-R | -                          | NP_001042646.1 Unknown function [O. sativa]                         | Unknown             |
| Pericycle     | 43580820  | EH211199   | Peri-G-f3-R | -                          | NP_001045981.1 Unknown function [O. sativa]                         | Unknown             |
| Pericycle     | 43580847  | EH211226   | Peri-G-f5-R | -                          | No database hit                                                     | Unknown             |
| Pericycle     | 43580857  | EH211236   | Peri-G-h5-R | -                          | NP_001062839.1 Unknown function [O. sativa]                         | Unknown             |
| Pericycle     | 43580853  | EH211232   | Peri-G-h6-R | -                          | No database hit                                                     | Unknown             |
| Pericycle     | 43580887  | EH211266   | Peri-Hd05.R | -                          | No database hit                                                     | Unknown             |
| Pericycle     | 43580901  | EH211280   | Peri-He04.R | -                          | BAE98425.1 Unknown function [A. thaliana]                           | Unknown             |
| Pericycle     | 43580896  | EH211275   | Peri-He05.R | -                          | YP_358637.1 Unknown function [P. aphrodite]                         | Unknown             |
| Pericycle     | 43580914  | EH211293   | Peri-Hg05.R | -                          | No database hit                                                     | Unknown             |
| Pericycle     | 43580727  | EH211106   | PF-A11      | -                          | No database hit                                                     | Unknown             |
| Pericycle     | 43580746  | EH211125   | PFB-A12     | -                          | No database hit                                                     | Unknown             |
| Pericycle     | 43580779  | EH211158   | PFB-G12     | -                          | BAD07869.1 Unknown function [O. sativa]                             | Unknown             |
| Pericycle     | 43580783  | EH211162   | PFB-H8      | -                          | No database hit                                                     | Unknown             |
| Pericycle     | 43580702  | EH211081   | PF-C10      | -                          | No database hit                                                     | Unknown             |
| Pericycle     | 43580784  | EH211163   | PFC-G2      | -                          | No database hit                                                     | Unknown             |
| Pericycle     | 43580759  | EH211138   | PF-H3       | -                          | No database hit                                                     | Unknown             |
| Pericycle     | 43580827  | EH211206   | Peri-Hf01.R | -                          | No database hit                                                     | Unknown             |
| Non-pericycle | 43580387  | EH210766   | ZZ-Ca04.r   | PUT-155a-Zea_mays-51568    | BAD25681.1 DnaJ-like protein MsJ1 [O. sativa]                       | Cell cycle          |
| Non-pericycle | 43580353  | EH210732   | ZZ-Be10.r   | PUT-155a-Zea_mays-26897    | AAT09201.1 skp1 protein [O. sativa]                                 | Cell cycle          |
| Non-pericycle | 43580252  | EH210631   | ZAc10.R     | PUT-155a-Zea_mays-95377737 | CAE52515.1 Alpha tubulin [S. viridis]                               | Cell fate           |
| Non-pericycle | 43580269  | EH210648   | ZAe05.R     | PUT-155a-Zea_mays-82777735 | ABE83243.1 Ribophorin I [M. truncatula]                             | Cell fate           |
| Non-pericycle | 43580517  | EH210896   | ZZ-De11.r   | PUT-155a-Zea_mays-75806    | Q8H6A5 Translationally-controlled tumor protein homolog [Z. mays]   | Cell fate           |
| Non-pericycle | 43580417  | EH210796   | ZZ-Cd06.r   | PUT-155a-Zea_mays-73697    | JC2511 Beta-tubulin R2242 [O. sativa]                               | Cell fate           |
| Non-pericycle | 43580230  | EH210609   | ZAg10.R     | PUT-155a-Zea_mays-63590    | ABF99200.1 Actin-related protein 7 [O. sativa]                      | Cell fate           |
| Non-pericycle | 43580306  | EH210685   | ZAh08.R     | PUT-155a-Zea_mays-61254    | Q41764 Actin-depolymerizing factor 3 [Z. mays]                      | Cell fate           |
| Non-pericycle | 43580469  | EH210848   | ZZ-Da03.r   | PUT-155a-Zea_mays-61254    | Q41764 Actin-depolymerizing factor 3 [Z. mays]                      | Cell fate           |
| Non-pericycle | 43580482  | EH210861   | ZZ-Db04.r   | PUT-155a-Zea_mays-53591    | AAD23407.1 Actin depolymerizing factor [Populus x canadensis]       | Cell fate           |
| Non-pericycle | 43580264  | EH210643   | ZAd10.R     | PUT-155a-Zea_mays-5122     | ABF94073.1 YT521-B-like family protein [O. sativa]                  | Cell fate           |
| Non-pericycle | 43580310  | EH210689   | ZZ-Bc03.r   | PUT-155a-Zea_mays-43369    | P22275 Alpha-3 tubulin [Z. mays]                                    | Cell fate           |
| Non-pericycle | 43580357  | EH210736   | ZZ-Bf06.r   | PUT-155a-Zea_mays-17777742 | AAV31120.1 Senescence-associated protein DH [Z. mays]               | Cell fate           |
| Non-pericycle | 43580256  | EH210635   | ZAd03.R     | PUT-155a-Zea_mays-13877740 | P14641 Tubulin alpha-2 chain [Z. mays]                              | Cell fate           |
| Non-pericycle | 43580239  | EH210618   | ZAb01.R     | PUT-155a-Zea_mays-13777740 | O22347 Tubulin alpha-1 [E. indica]                                  | Cell fate           |
| Non-pericycle | 43580458  | EH210837   | ZZ-Cg08.r   | PUT-155a-Zea_mays-13777740 | O22347 Tubulin alpha-1 [E. indica]                                  | Cell fate           |
| Non-pericycle | 43580247  | EH210626   | ZAc04.R     | PUT-155a-Zea_mays-013087   | AAG10041.1 Actin [S. italica]                                       | Cell fate           |
| Non-pericycle | 43580294  | EH210673   | ZZ-Bc12.r   | PUT-155a-Zea_mays-95577739 | AAV88601.1 Low temperature and salt responsive protein [P. glaucum] | Disease/defense     |
| Non-pericycle | 43580454  | EH210833   | ZZ-Ch06.r   | PUT-155a-Zea_mays-95577739 | AAV88601.1 Low temperature and salt responsive protein [P. glaucum] | Disease/defense     |

| Cell-type     | db_EST ID | Genbank AC | In house ID | Anchoring                   | AC Function [species]                                                    | Functional category |
|---------------|-----------|------------|-------------|-----------------------------|--------------------------------------------------------------------------|---------------------|
| Non-pericycle | 43580470  | EH210849   | ZZ-Da09.r   | PUT-155a-Zea_mays-95577739  | AAV88601.1 Low temperature and salt responsive protein [P. glaucum]      | Disease/defense     |
| Non-pericycle | 43580407  | EH210786   | ZZ-Cb11.r   | PUT-155a-Zea_mays-88177735  | AAZ79357.1 Ascorbate peroxidase [V. pseudoreticulata]                    | Disease/defense     |
| Non-pericycle | 43580324  | EH210703   | ZZ-Bb06.r   | PUT-155a-Zea_mays-83877736  | BAB68268.1 Drought inducible 22 kD protein [S. officinarum]              | Disease/defense     |
| Non-pericycle | 43580270  | EH210649   | ZAh06.R     | PUT-155a-Zea_mays-82        | AAC49975.1 Able to induce HR-like lesions [N. tabacum]                   | Disease/defense     |
| Non-pericycle | 43580316  | EH210695   | ZZ-Ba12.r   | PUT-155a-Zea_mays-82        | AAC49975.1 Able to induce HR-like lesions [N. tabacum]                   | Disease/defense     |
| Non-pericycle | 43580438  | EH210817   | ZZ-Cf01.r   | PUT-155a-Zea_mays-74177735  | AAZ79357.1 Ascorbate peroxidase [V. pseudoreticulata]                    | Disease/defense     |
| Non-pericycle | 43580254  | EH210633   | ZAf03.R     | PUT-155a-Zea_mays-67778     | AAM63750.1 pop3 peptide [A. thaliana]                                    | Disease/defense     |
| Non-pericycle | 43580303  | EH210682   | ZZ-Ba01.r   | PUT-155a-Zea_mays-67777743  | AAC78473.1 Thioredoxin peroxidase [S. cereale]                           | Disease/defense     |
| Non-pericycle | 43580490  | EH210869   | ZZ-Dc05.r   | PUT-155a-Zea_mays-66190     | AAY26392.1 Salt tolerant protein [T. aestivum]                           | Disease/defense     |
| Non-pericycle | 43580479  | EH210858   | ZZ-Db01.r   | PUT-155a-Zea_mays-61789     | AAO17017.1 Heat shock 70 KD protein [O. sativa]                          | Disease/defense     |
| Non-pericycle | 43580293  | EH210672   | ZAh12.R     | PUT-155a-Zea_mays-38477738  | P12653 Glutathione S-transferase I [Z. mays]                             | Disease/defense     |
| Non-pericycle | 43580415  | EH210794   | ZZ-Cc09.r   | PUT-155a-Zea_mays-38477738  | P12653 Glutathione S-transferase I [Z. mays]                             | Disease/defense     |
| Non-pericycle | 43580522  | EH210901   | ZZ-De03.r   | PUT-155a-Zea_mays-38477738  | P12653 Glutathione S-transferase I [Z. mays]                             | Disease/defense     |
| Non-pericycle | 43580516  | EH210895   | ZZ-De12.r   | PUT-155a-Zea_mays-38477738  | P12653 Glutathione S-transferase I [Z. mays]                             | Disease/defense     |
| Non-pericycle | 43580274  | EH210653   | ZAe08.R     | PUT-155a-Zea_mays-35019     | AAG34830.1 Glutathione S-transferase GST 22 [Z. mays]                    | Disease/defense     |
| Non-pericycle | 43580504  | EH210883   | ZZ-Dd06.r   | PUT-155a-Zea_mays-27577741  | NP_187709.2 SAG20 [A. thaliana]                                          | Disease/defense     |
| Non-pericycle | 43580376  | EH210755   | ZZ-Bg10.r   | PUT-155a-Zea_mays-122177737 | CAA47948.2 Heat shock protein 70 [O. sativa]                             | Disease/defense     |
| Non-pericycle | 43580426  | EH210805   | ZZ-Ce02.r   | PUT-155a-Zea_mays-111977744 | P33126 Heat shock protein 81-1 [O. sativa]                               | Disease/defense     |
| Non-pericycle | 43580382  | EH210761   | ZZ-Bh05.r   | PUT-155a-Zea_mays-10577735  | AAA96137.1 Peroxidase [S. humilis]                                       | Disease/defense     |
| Non-pericycle | 43580283  | EH210662   | ZAf04.R     | PUT-155a-Zea_mays-10347     | AAM28296.1 Peroxidase [A. comosus]                                       | Disease/defense     |
| Non-pericycle | 43580548  | EH210927   | ZZ-Dh06.r   | PUT-155a-Zea_mays-10347     | AAM28296.1 Peroxidase [A. comosus]                                       | Disease/defense     |
| Non-pericycle | 43580232  | EH210611   | ZAa08.R     | PUT-155a-Zea_mays-046682    | Q9ARD5 Low temperature-induced protein It101.2 [H. vulgare]              | Disease/defense     |
| Non-pericycle | 43580456  | EH210835   | ZZ-Cg10.r   | -                           | ABE79560.1 Heat shock protein Hsp70 [M. truncatula]                      | Disease/defense     |
| Non-pericycle | 43580262  | EH210641   | ZAe03.R     | PUT-155a-Zea_mays-74717     | AAA33466.1 Glyceraldehyde-3-phosphate dehydrogenase [Z. mays]            | Energy              |
| Non-pericycle | 43580528  | EH210907   | ZZ-Df03.r   | PUT-155a-Zea_mays-74448     | AAA87580.1 Glyceraldehyde-3-phosphate dehydrogenase GAPC4 [Z. mays]      | Energy              |
| Non-pericycle | 43580444  | EH210823   | ZZ-Cf03.r   | PUT-155a-Zea_mays-52335     | BAD08451.1 Glucose-6-phosphate isomerase [O. sativa]                     | Energy              |
| Non-pericycle | 43580344  | EH210723   | ZZ-Bd11.r   | PUT-155a-Zea_mays-40674     | NP_192171.1 Hydrogen-transporting ATP synthase [A. thaliana]             | Energy              |
| Non-pericycle | 43580380  | EH210759   | ZZ-Ca03.r   | PUT-155a-Zea_mays-37377736  | CAA53366.1 Cytochrome b5 [O. sativa]                                     | Energy              |
| Non-pericycle | 43580525  | EH210904   | ZZ-Df05.r   | PUT-155a-Zea_mays-33497     | P19023 ATP synthase subunit beta [Z. mays]                               | Energy              |
| Non-pericycle | 43580281  | EH210660   | ZAf11.R     | PUT-155a-Zea_mays-24404     | Q41898 ATP synthase epsilon chain [Z. mays]                              | Energy              |
| Non-pericycle | 43580511  | EH210890   | ZZ-Dd11.r   | PUT-155a-Zea_mays-24404     | Q41898 ATP synthase epsilon chain [Z. mays]                              | Energy              |
| Non-pericycle | 43580258  | EH210637   | ZAd07.R     | PUT-155a-Zea_mays-082734    | ABE92785.1 Photosynthetic reaction center, H-chain [M. truncatula]       | Energy              |
| Non-pericycle | 43580391  | EH210770   | ZZ-Ca10.r   | PUT-155a-Zea_mays-082734    | ABE92785.1 Photosynthetic reaction center, H-chain [M. truncatula]       | Energy              |
| Non-pericycle | 43580393  | EH210772   | ZZ-Cb04.r   | PUT-155a-Zea_mays-082734    | ABE92785.1 Photosynthetic reaction center, H-chain [M. truncatula]       | Energy              |
| Non-pericycle | 43580446  | EH210825   | ZZ-Cf05.r   | PUT-155a-Zea_mays-082734    | ABE92785.1 Photosynthetic reaction center, H-chain [M. truncatula]       | Energy              |
| Non-pericycle | 43580493  | EH210872   | ZZ-Db10.r   | PUT-155a-Zea_mays-019531    | YP_588313.1 ATPase subunit 4 [Z. mays]                                   | Energy              |
| Non-pericycle | 43580413  | EH210792   | ZZ-Cc05.r   | PUT-155a-Zea_mays-019483    | YP_588313.1 ATPase subunit 4 [Z. mays]                                   | Energy              |
| Non-pericycle | 43580341  | EH210720   | ZZ-Bd05.r   | PUT-155a-Zea_mays-014006    | Q40078 Vacuolar ATP synthase subunit B isoform 1 [H. vulgare]            | Energy              |
| Non-pericycle | 43580237  | EH210616   | ZAb08.R     | -                           | NP_195496.1 Cytochrome-c oxidase [A. thaliana]                           | Energy              |
| Non-pericycle | 43580261  | EH210640   | ZAd05.R     | -                           | BAB21526.1 ATP synthase 6 KD subunit [O. sativa]                         | Energy              |
| Non-pericycle | 43580375  | EH210754   | ZZ-Bg07.r   | PUT-155a-Zea_mays-98877737  | AAC27703.1 Putative cytosolic 6-phosphogluconate dehydrogenase [Z. mays] | Metabolism          |
| Non-pericycle | 43580450  | EH210829   | ZZ-Ch11.r   | PUT-155a-Zea_mays-90177744  | NP_180811.1 Hydrolase [A. thaliana]                                      | Metabolism          |
| Non-pericycle | 43580358  | EH210737   | ZZ-Bh06.r   | PUT-155a-Zea_mays-86777744  | BAD35388.1 HGA4 [O. sativa]                                              | Metabolism          |
| Non-pericycle | 43580519  | EH210898   | ZZ-Df02.r   | PUT-155a-Zea_mays-8200      | ABA94670.2 Acyl-coenzyme A oxidase 2 [O. sativa]                         | Metabolism          |

| Cell-type     | db_EST ID | Genbank AC | In house ID | Anchoring                   | AC Function [species]                                                        | Functional category |
|---------------|-----------|------------|-------------|-----------------------------|------------------------------------------------------------------------------|---------------------|
| Non-pericycle | 43580410  | EH210789   | ZZ-Cc10.r   | PUT-155a-Zea_mays-79977738  | ABI95399.1 Fasciclin-like protein FLA9 [T. aestivum]                         | Metabolism          |
| Non-pericycle | 43580267  | EH210646   | ZAe02.R     | PUT-155a-Zea_mays-77377739  | O24575 S-adenosylmethionine decarboxylase proenzyme [Z. mays]                | Metabolism          |
| Non-pericycle | 43580314  | EH210693   | ZZ-Ba05.r   | PUT-155a-Zea_mays-76541     | AAF98579.1 Contains similarity to PIR7A protein [A. thaliana]                | Metabolism          |
| Non-pericycle | 43580337  | EH210716   | ZZ-Bd06.r   | PUT-155a-Zea_mays-75424     | CAI30071.1 Glycosyltransferase [T. aestivum]                                 | Metabolism          |
| Non-pericycle | 43580248  | EH210627   | ZAa02.R     | PUT-155a-Zea_mays-75014     | P04712 Sucrose synthase 1 [Z. mays]                                          | Metabolism          |
| Non-pericycle | 43580503  | EH210882   | ZZ-Dd03.r   | PUT-155a-Zea_mays-70713     | CAJ44304.1 Soluble inorganic pyrophosphatase [P. rheas]                      | Metabolism          |
| Non-pericycle | 43580537  | EH210916   | ZZ-Dg03.r   | PUT-155a-Zea_mays-70077737  | AAT70230.1 Betaine aldehyde dehydrogenase [Z. mays]                          | Metabolism          |
| Non-pericycle | 43580478  | EH210857   | ZZ-Db06.r   | PUT-155a-Zea_mays-66910     | AAF89962.1 Cellulose synthase-2 [Z. mays]                                    | Metabolism          |
| Non-pericycle | 43580309  | EH210688   | ZZ-Bg09.r   | PUT-155a-Zea_mays-66077744  | AAU10802.1 Endo-1,3;1,4-beta-D-glucanase' [O. sativa]                        | Metabolism          |
| Non-pericycle | 43580532  | EH210911   | ZZ-Df10.r   | PUT-155a-Zea_mays-65877735  | P08440 Fructose-bisphosphate aldolase [Z. mays]                              | Metabolism          |
| Non-pericycle | 43580253  | EH210632   | ZAe10.R     | PUT-155a-Zea_mays-65444     | AAP37879.1 Caffeoyl CoA 3-O-methyltransferase [Z. mays]                      | Metabolism          |
| Non-pericycle | 43580308  | EH210687   | ZZ-Ba07.r   | PUT-155a-Zea_mays-64264     | ABA97575.2 Serine hydroxymethyltransferase [O. sativa]                       | Metabolism          |
| Non-pericycle | 43580411  | EH210790   | ZZ-Cc01.r   | PUT-155a-Zea_mays-64116     | BAB08003.1 Adenine phosphoribosyltransferase [H. vulgare]                    | Metabolism          |
| Non-pericycle | 43580518  | EH210897   | ZZ-Df09.r   | PUT-155a-Zea_mays-6177739   | AAO26315.1 6-phosphogluconolactonase [E. guineensis]                         | Metabolism          |
| Non-pericycle | 43580228  | EH210607   | ZAd01.R     | PUT-155a-Zea_mays-59926     | AAF76207.1 Lipoxygenase [Z. mays]                                            | Metabolism          |
| Non-pericycle | 43580443  | EH210822   | ZZ-Cf09.r   | PUT-155a-Zea_mays-59924     | AAF76207.1 Lipoxygenase [Z. mays]                                            | Metabolism          |
| Non-pericycle | 43580471  | EH210850   | ZZ-Da06.r   | PUT-155a-Zea_mays-59677742  | CAC14890.1 d-TDP-glucose dehydratase [P. australis]                          | Metabolism          |
| Non-pericycle | 43580527  | EH210906   | ZZ-Df01.r   | PUT-155a-Zea_mays-58977738  | CAA11391.1 Phytase [Z. mays]                                                 | Metabolism          |
| Non-pericycle | 43580459  | EH210838   | ZZ-Cg11.r   | PUT-155a-Zea_mays-58877741  | P49076 ADP-ribosylation factor [Z. mays]                                     | Metabolism          |
| Non-pericycle | 43580290  | EH210669   | ZAg05.R     | PUT-155a-Zea_mays-57135     | P48502 Ubiquinol-cytochrome c reductase complex 14 kDa prot. [S. tuberosum]  | Metabolism          |
| Non-pericycle | 43580319  | EH210698   | ZZ-Bc01.r   | PUT-155a-Zea_mays-53085     | AAL73524.1 Tryptophan synthase beta-subunit [S. bicolor]                     | Metabolism          |
| Non-pericycle | 43580389  | EH210768   | ZZ-Ca12.r   | PUT-155a-Zea_mays-51377744  | NP_567970.1 Catalytic/ oxidoreductase, acting on NADH or NADPH [A. thaliana] | Metabolism          |
| Non-pericycle | 43580534  | EH210913   | ZZ-Df12.r   | PUT-155a-Zea_mays-51327     | ABG34279.1 Polygalacturonase [E. globulus]                                   | Metabolism          |
| Non-pericycle | 43580370  | EH210749   | ZZ-Cb09.r   | PUT-155a-Zea_mays-50666     | BAD27711.1 Citrate synthase, glyoxysomal precursor [O. sativa]               | Metabolism          |
| Non-pericycle | 43580405  | EH210784   | ZZ-Cd02.r   | PUT-155a-Zea_mays-49500     | AAK20055.1 Cellulase [O. sativa]                                             | Metabolism          |
| Non-pericycle | 43580367  | EH210746   | ZZ-Bf07.r   | PUT-155a-Zea_mays-49090     | AAQ55458.1 NADH:ubiquinone oxidoreductase 39 kDa subunit [C. reinhardtii]    | Metabolism          |
| Non-pericycle | 43580271  | EH210650   | ZAf06.R     | PUT-155a-Zea_mays-48261     | BAA28170.1 Phosphoenolpyruvate carboxylase [Z. mays]                         | Metabolism          |
| Non-pericycle | 43580342  | EH210721   | ZZ-Bd03.r   | PUT-155a-Zea_mays-47977737  | BAD33246.1 PPI-fructose 6-phosphate 1-phosphotransferase [O. sativa]         | Metabolism          |
| Non-pericycle | 43580451  | EH210830   | ZZ-Cg02.r   | PUT-155a-Zea_mays-44977744  | ABK51382.1 H+-translocating pyrophosphatase [Z. mays]                        | Metabolism          |
| Non-pericycle | 43580257  | EH210636   | ZAc11.R     | PUT-155a-Zea_mays-44885     | CAI44139.1 Xyloglucan endo-transglycosylase/hydrolase [Z. mays]              | Metabolism          |
| Non-pericycle | 43580280  | EH210659   | ZAg04.R     | PUT-155a-Zea_mays-39801     | CAI93185.1 Glycosyltransferase [Z. mays]                                     | Metabolism          |
| Non-pericycle | 43580347  | EH210726   | ZZ-Be09.r   | PUT-155a-Zea_mays-36100     | CAC14890.1 d-TDP-glucose dehydratase [P. australis]                          | Metabolism          |
| Non-pericycle | 43580364  | EH210743   | ZZ-Bf05.r   | PUT-155a-Zea_mays-34748     | ABI95416.1 Fasciclin-like protein FLA26 [T. aestivum]                        | Metabolism          |
| Non-pericycle | 43580476  | EH210855   | ZZ-Da07.r   | PUT-155a-Zea_mays-30601     | AAO62313.1 UDP-glucose dehydrogenase [C. esculenta]                          | Metabolism          |
| Non-pericycle | 43580486  | EH210865   | ZZ-Dc02.r   | PUT-155a-Zea_mays-28856     | P26301 2-phosphoglycerate dehydratase 1 [Z. mays]                            | Metabolism          |
| Non-pericycle | 43580520  | EH210899   | ZZ-De07.r   | PUT-155a-Zea_mays-26557     | AAF37733.1 4-coumarate--CoA ligase 4CL2 [L. perenne]                         | Metabolism          |
| Non-pericycle | 43580420  | EH210799   | ZZ-Cg09.r   | PUT-155a-Zea_mays-22419     | P93804 Glucose phosphomutase 1 [Z. mays]                                     | Metabolism          |
| Non-pericycle | 43580331  | EH210710   | ZZ-Bd10.r   | PUT-155a-Zea_mays-16377742  | CAJ01702.1 AdoMet synthase 1 [H. vulgare]                                    | Metabolism          |
| Non-pericycle | 43580340  | EH210719   | ZZ-Bf04.r   | PUT-155a-Zea_mays-16377742  | CAJ01702.1 AdoMet synthase 1 [H. vulgare]                                    | Metabolism          |
| Non-pericycle | 43580535  | EH210914   | ZZ-Dh11.r   | PUT-155a-Zea_mays-14623     | NP_177543.1 Phosphopyruvate hydratase [A. thaliana]                          | Metabolism          |
| Non-pericycle | 43580349  | EH210728   | ZZ-Bf08.r   | PUT-155a-Zea_mays-11377741  | BAD86939.1 Pyrophosphate-dependent phosphofructo-1-kinase [O. sativa]        | Metabolism          |
| Non-pericycle | 43580408  | EH210787   | ZZ-Cc06.r   | PUT-155a-Zea_mays-11377741  | BAD86939.1 Pyrophosphate-dependent phosphofructo-1-kinase [O. sativa]        | Metabolism          |
| Non-pericycle | 43580547  | EH210926   | ZZ-Dh05.r   | PUT-155a-Zea_mays-110177738 | P93554 Nucleoside diphosphate kinase 1 [S. officinarum]                      | Metabolism          |
| Non-pericycle | 43580441  | EH210820   | ZZ-Ce11.r   | PUT-155a-Zea_mays-109277739 | P93554 Nucleoside diphosphate kinase 1 [S. officinarum]                      | Metabolism          |

| Cell-type     | db_EST ID | Genbank AC | In house ID | Anchoring                   | AC Function [species]                                                    | Functional category |
|---------------|-----------|------------|-------------|-----------------------------|--------------------------------------------------------------------------|---------------------|
| Non-pericycle | 43580300  | EH210679   | ZAh09.R     | PUT-155a-Zea_mays-10177741  | NP_565186.2 Catalytic/ gamma-glutamyl hydrolase [A. thaliana]            | Metabolism          |
| Non-pericycle | 43580242  | EH210621   | ZAe01.R     | PUT-155a-Zea_mays-092511    | AAP06752.1 Vacuolar proton-inorganic pyrophosphatase [H. brevisubulatum] | Metabolism          |
| Non-pericycle | 43580498  | EH210877   | ZZ-Dc11.r   | PUT-155a-Zea_mays-014312    | AAP80640.1 Succinate dehydrogenase subunit 3 [T. aestivum]               | Metabolism          |
| Non-pericycle | 43580402  | EH210781   | ZZ-Cb02.r   | PUT-155a-Zea_mays-97377743  | AAZ20285.1 Ubiquitin fusion protein [A. hypogaea]                        | Protein fate        |
| Non-pericycle | 43580369  | EH210748   | ZZ-Bg05.r   | PUT-155a-Zea_mays-6977737   | O22655 Profilin-4 [Z. mays]                                              | Protein fate        |
| Non-pericycle | 43580351  | EH210730   | ZZ-Be04.r   | PUT-155a-Zea_mays-6924      | P20973 Ubiquitin-activating enzyme E1 [T. aestivum]                      | Protein fate        |
| Non-pericycle | 43580515  | EH210894   | ZZ-De01.r   | PUT-155a-Zea_mays-6924      | P20973 Ubiquitin-activating enzyme E1 [T. aestivum]                      | Protein fate        |
| Non-pericycle | 43580492  | EH210871   | ZZ-Db12.r   | PUT-155a-Zea_mays-68422     | BAD53635.1 F-box family protein-like [O. sativa]                         | Protein fate        |
| Non-pericycle | 43580424  | EH210803   | ZZ-Ce04.r   | PUT-155a-Zea_mays-68160     | AAL35400.1 Ubiquitin conjugating enzyme 2 [Z. mays]                      | Protein fate        |
| Non-pericycle | 43580378  | EH210757   | ZZ-Bh12.r   | PUT-155a-Zea_mays-58677742  | AAC49014.1 Ubiquitin [Z. mays]                                           | Protein fate        |
| Non-pericycle | 43580345  | EH210724   | ZZ-Bd08.r   | PUT-155a-Zea_mays-52876     | NP_189124.1 prt1 - ubiquitin-protein ligase [A. thaliana]                | Protein fate        |
| Non-pericycle | 43580508  | EH210887   | ZZ-Df04.r   | PUT-155a-Zea_mays-42022     | NP_043005.1 Maturase [Z. mays]                                           | Protein fate        |
| Non-pericycle | 43580276  | EH210655   | ZZ-Ba02.r   | PUT-155a-Zea_mays-37130     | BAA96838.1 Beta 5 subunit of 20S proteasome [O. sativa]                  | Protein fate        |
| Non-pericycle | 43580323  | EH210702   | ZZ-Bb02.r   | PUT-155a-Zea_mays-37130     | [BAA96838.1] beta 5 subunit of 20S proteasome [O. sativa]                | Protein fate        |
| Non-pericycle | 43580332  | EH210711   | ZZ-Be01.r   | PUT-155a-Zea_mays-36677736  | CAC37797.1 BAX inhibitor 1 [H. vulgare]                                  | Protein fate        |
| Non-pericycle | 43580384  | EH210763   | ZZ-Cb10.r   | PUT-155a-Zea_mays-31048     | AAB63591.1 10 kDa chaperonin [O. sativa]                                 | Protein fate        |
| Non-pericycle | 43580352  | EH210731   | ZZ-Be06.r   | PUT-155a-Zea_mays-26710     | ABE83180.1 Ubiquitin-conjugating enzyme, E2 [M. truncatula]              | Protein fate        |
| Non-pericycle | 43580524  | EH210903   | ZZ-De04.r   | PUT-155a-Zea_mays-097512    | AAK13589.1 rRNA intron-encoded homing endonuclease [O. sativa]           | Protein fate        |
| Non-pericycle | 43580327  | EH210706   | ZZ-Bc07.r   | PUT-155a-Zea_mays-066008    | NP_189124.1 PRT1 ubiquitin-protein ligase [A. thaliana]                  | Protein fate        |
| Non-pericycle | 43580227  | EH210606   | ZAa01.R     | PUT-155a-Zea_mays-05085     | CAA05772.1 Ubiquitin carrier protein [Z. mays]                           | Protein fate        |
| Non-pericycle | 43580243  | EH210622   | ZAa05.R     | PUT-155a-Zea_mays-017038    | NP_174210.1 19S Proteasome subunit 9 [A. thaliana]                       | Protein fate        |
| Non-pericycle | 43580301  | EH210680   | ZAh03.R     | PUT-155a-Zea_mays-017038    | NP_174210.1 19S Proteasome subunit 9 [A. thaliana]                       | Protein fate        |
| Non-pericycle | 43580429  | EH210808   | ZZ-Cd12.r   | PUT-155a-Zea_mays-016013    | O04725 Profilin [C. dactylon]                                            | Protein fate        |
| Non-pericycle | 43580437  | EH210816   | ZZ-Cf10.r   | PUT-155a-Zea_mays-016013    | O04725 Profilin [C. dactylon]                                            | Protein fate        |
| Non-pericycle | 43580434  | EH210813   | ZZ-Ce08.r   | PUT-155a-Zea_mays-016012    | O04725 Profilin [C. dactylon]                                            | Protein fate        |
| Non-pericycle | 43580289  | EH210668   | ZZ-Bb07.r   | MAGI4_16645                 | ABE84625.1 t-snare; Protein kinase PKN/PRK1, effector [M. sativa]        | Protein fate        |
| Non-pericycle | 43580231  | EH210610   | ZAc05.R     | -                           | AAB82138.1 Proteasome component [O. sativa]                              | Protein fate        |
| Non-pericycle | 43580431  | EH210810   | ZZ-Cf06.r   | PUT-155a-Zea_mays-86477744  | ABA94602.1 40S ribosomal protein S9 [O. sativa]                          | Protein synthesis   |
| Non-pericycle | 43580414  | EH210793   | ZZ-Cc04.r   | PUT-155a-Zea_mays-7680      | NP_191121.1 Translation initiation factor [A. thaliana]                  | Protein synthesis   |
| Non-pericycle | 43580475  | EH210854   | ZZ-Dc08.r   | PUT-155a-Zea_mays-75340     | O24573 60S acidic ribosomal protein P0 [Z. mays]                         | Protein synthesis   |
| Non-pericycle | 43580462  | EH210841   | ZZ-Ch10.r   | PUT-155a-Zea_mays-74789     | P56330 Protein translation factor SU1 [Z. mays]                          | Protein synthesis   |
| Non-pericycle | 43580544  | EH210923   | ZZ-Dg12.r   | PUT-155a-Zea_mays-64471     | P19950 40S ribosomal protein S14 [Z. mays]                               | Protein synthesis   |
| Non-pericycle | 43580428  | EH210807   | ZZ-Ce06.r   | PUT-155a-Zea_mays-45455     | ABK34475.1 Initiation factor 3e [O. sativa]                              | Protein synthesis   |
| Non-pericycle | 43580439  | EH210818   | ZZ-Ce09.r   | PUT-155a-Zea_mays-41077738  | NP_001030985.1 Structural constituent of ribosome [A. thaliana]          | Protein synthesis   |
| Non-pericycle | 43580246  | EH210625   | ZAa04.R     | PUT-155a-Zea_mays-40577735  | O48557 60S ribosomal protein L17 [Z. mays]                               | Protein synthesis   |
| Non-pericycle | 43580409  | EH210788   | ZZ-Cb12.r   | PUT-155a-Zea_mays-29077744  | AAM47582.1 60S ribosomal protein [S. bicolor]                            | Protein synthesis   |
| Non-pericycle | 43580363  | EH210742   | ZZ-Bg03.r   | PUT-155a-Zea_mays-2611      | AAF42977.1 Elongation factor 1 alpha [Z. mays]                           | Protein synthesis   |
| Non-pericycle | 43580395  | EH210774   | ZZ-Ca06.r   | PUT-155a-Zea_mays-18348     | AAC97381.1 40S ribosomal protein S27 homolog [Z. mays]                   | Protein synthesis   |
| Non-pericycle | 43580507  | EH210886   | ZZ-Dd05.r   | PUT-155a-Zea_mays-18348     | AAC97381.1 40S ribosomal protein S27 homolog [Z. mays]                   | Protein synthesis   |
| Non-pericycle | 43580263  | EH210642   | ZAd08.R     | PUT-155a-Zea_mays-14777741  | AAT08750.1 Ribosomal protein L7 [H. orientalis]                          | Protein synthesis   |
| Non-pericycle | 43580343  | EH210722   | ZZ-Be03.r   | PUT-155a-Zea_mays-127877743 | AAW50989.1 Ribosomal protein L7 [T. aestivum]                            | Protein synthesis   |
| Non-pericycle | 43580278  | EH210657   | ZAg06.R     | PUT-155a-Zea_mays-120277744 | O48557 60S ribosomal protein L17 [Z. mays]                               | Protein synthesis   |
| Non-pericycle | 43580287  | EH210666   | ZZ-Bc06.r   | PUT-155a-Zea_mays-120277744 | O48557 60S ribosomal protein L17 [Z. mays]                               | Protein synthesis   |
| Non-pericycle | 43580383  | EH210762   | ZZ-Bh07.r   | PUT-155a-Zea_mays-120277744 | O48557 60S ribosomal protein L17 [Z. mays]                               | Protein synthesis   |

| Cell-type     | db_EST ID | Genbank AC | In house ID | Anchoring                   | AC Function [species]                                                  | Functional category       |
|---------------|-----------|------------|-------------|-----------------------------|------------------------------------------------------------------------|---------------------------|
| Non-pericycle | 43580485  | EH210864   | ZZ-Db08.r   | PUT-155a-Zea_mays-120277744 | O48557 60S ribosomal protein L17 [Z. mays]                             | Protein synthesis         |
| Non-pericycle | 43580255  | EH210634   | ZAe04.R     | PUT-155a-Zea_mays-115677741 | AAR15081.1 Translational elongation factor 1 subunit beta [P. sativum] | Protein synthesis         |
| Non-pericycle | 43580510  | EH210889   | ZZ-Dd12.r   | PUT-155a-Zea_mays-115677741 | AAR15081.1 Translational elongation factor 1 subunit beta [P. sativum] | Protein synthesis         |
| Non-pericycle | 43580404  | EH210783   | ZZ-Cf08.r   | PUT-155a-Zea_mays-111777738 | BAD09090.1 60S ribosomal protein L10A (RPL10aC) [O. sativa]            | Protein synthesis         |
| Non-pericycle | 43580295  | EH210674   | ZAg07.R     | PUT-155a-Zea_mays-10289     | NP_178360.2 CAND1 [A. thaliana]                                        | Protein synthesis         |
| Non-pericycle | 43580292  | EH210671   | ZAg12.R     | PUT-155a-Zea_mays-034056    | CAB06653.1 Histidyl tRNA Synthetase [O. sativa]                        | Protein synthesis         |
| Non-pericycle | 43580381  | EH210760   | ZZ-Bh03.r   | PUT-155a-Zea_mays-018036    | ABF99104.1 Ribosomal protein S14p/S29e containing protein [O. sativa]  | Protein synthesis         |
| Non-pericycle | 43580355  | EH210734   | ZZ-Be07.r   | PUT-155a-Zea_mays-74981     | BAD21599.1 Nucleolar RNA-binding Nop10p-like protein [O. sativa]       | Protein w/ bind. function |
| Non-pericycle | 43580365  | EH210744   | ZZ-Bg02.r   | PUT-155a-Zea_mays-74981     | BAD21599.1 Nucleolar RNA-binding Nop10p-like protein [O. sativa]       | Protein w/ bind. function |
| Non-pericycle | 43580529  | EH210908   | ZZ-Dg09.r   | PUT-155a-Zea_mays-6273      | ABB02636.1 RAD23-like [S. tuberosum]                                   | Protein w/ bind. function |
| Non-pericycle | 43580400  | EH210779   | ZZ-Cb05.r   | PUT-155a-Zea_mays-58586     | NP_199342.2 Ubiquitin-protein ligase [A. thaliana]                     | Protein w/ bind. function |
| Non-pericycle | 43580307  | EH210686   | ZZ-Ba09.r   | PUT-155a-Zea_mays-56077743  | P04709 ATP carrier protein 1 [Z. mays]                                 | Protein w/ bind. function |
| Non-pericycle | 43580240  | EH210619   | ZAc03.R     | PUT-155a-Zea_mays-55318     | NP_200445.1 Ubiquitin-protein ligase [A. thaliana]                     | Protein w/ bind. function |
| Non-pericycle | 43580396  | EH210775   | ZZ-Cb03.r   | PUT-155a-Zea_mays-48737     | BAD17091.1 Poly(A) binding protein [O. sativa]                         | Protein w/ bind. function |
| Non-pericycle | 43580315  | EH210694   | ZZ-Bb04.r   | PUT-155a-Zea_mays-38825     | NP_564870.1 Metal ion binding [A. thaliana]                            | Protein w/ bind. function |
| Non-pericycle | 43580505  | EH210884   | ZZ-Dd02.r   | PUT-155a-Zea_mays-38777739  | CAB56619.1 Phragmoplastin [N. tabacum]                                 | Protein w/ bind. function |
| Non-pericycle | 43580536  | EH210915   | ZZ-Dh01.r   | PUT-155a-Zea_mays-33018     | BAD94469.1 RNA-binding protein [A. thaliana]                           | Protein w/ bind. function |
| Non-pericycle | 43580279  | EH210658   | ZAf02.R     | PUT-155a-Zea_mays-32663     | CAH69231.1 ML domain protein [N. glauca]                               | Protein w/ bind. function |
| Non-pericycle | 43580449  | EH210828   | ZZ-Cf07.r   | PUT-155a-Zea_mays-3022      | BAD46727.1 AML1 [O. sativa]                                            | Protein w/ bind. function |
| Non-pericycle | 43580321  | EH210700   | ZZ-Bg11.r   | PUT-155a-Zea_mays-122477738 | BAD09673.1 Histone H2B.2 [O. sativa]                                   | Protein w/ bind. function |
| Non-pericycle | 43580260  | EH210639   | ZAe06.R     | PUT-155a-Zea_mays-109877741 | P27347 DNA-binding protein MNB1B (HMG1-like protein) [Z. mays]         | Protein w/ bind. function |
| Non-pericycle | 43580386  | EH210765   | ZZ-Ca02.r   | PUT-155a-Zea_mays-109877741 | P27347 DNA-binding protein MNB1B (HMG1-like protein) [Z. mays]         | Protein w/ bind. function |
| Non-pericycle | 43580491  | EH210870   | ZZ-Db11.r   | PUT-155a-Zea_mays-109877741 | P27347 DNA-binding protein MNB1B (HMG1-like protein) [Z. mays]         | Protein w/ bind. function |
| Non-pericycle | 43580488  | EH210867   | ZZ-Dc06.r   | PUT-155a-Zea_mays-09612     | ABF96021.1 Tetratricopeptide repeat protein 11 [O. sativa]             | Protein w/ bind. function |
| Non-pericycle | 43580330  | EH210709   | ZZ-Bc05.r   | PUT-155a-Zea_mays-018211    | P49120 Histone H2B.4 [Z. mays]                                         | Protein w/ bind. function |
| Non-pericycle | 43580448  | EH210827   | ZZ-Cg01.r   | PUT-155a-Zea_mays-014511    | AAS01974.1 Putative chloroplastic RNA-binding protein [O. sativa]      | Protein w/ bind. function |
| Non-pericycle | 43580418  | EH210797   | ZZ-Cd08.r   | PUT-155a-Zea_mays-014178    | BAC84637.1 Small nuclear ribonucleoprotein E [O. sativa]               | Protein w/ bind. function |
| Non-pericycle | 43580372  | EH210751   | ZZ-Bh04.r   | PUT-155a-Zea_mays-013341    | NP_197589.1 ATP binding / protein binding [A. thaliana]                | Protein w/ bind. function |
| Non-pericycle | 43580235  | EH210614   | ZAc12.R     | PUT-155a-Zea_mays-96677741  | BAD25150.1 Protein kinase 2 [O. sativa]                                | Signal transduction       |
| Non-pericycle | 43580465  | EH210844   | ZZ-Da01.r   | PUT-155a-Zea_mays-9159      | NP_177411.1 Calmodulin binding [A. thaliana]                           | Signal transduction       |
| Non-pericycle | 43580455  | EH210834   | ZZ-Cg03.r   | PUT-155a-Zea_mays-7877737   | BAD52827.1 Receptor-like protein kinase 1-like [O. sativa]             | Signal transduction       |
| Non-pericycle | 43580368  | EH210747   | ZZ-Bf09.r   | PUT-155a-Zea_mays-71652     | Q40787 Ras-related protein Rab7 [P. ciliare]                           | Signal transduction       |
| Non-pericycle | 43580385  | EH210764   | ZZ-Bh11.r   | PUT-155a-Zea_mays-68664     | CAA46150.1 Calmodulin [O. sativa]                                      | Signal transduction       |
| Non-pericycle | 43580435  | EH210814   | ZZ-Ce07.r   | PUT-155a-Zea_mays-50652     | NP_567984.1 Pantothenate kinase [A. thaliana]                          | Signal transduction       |
| Non-pericycle | 43580521  | EH210900   | ZZ-De06.r   | PUT-155a-Zea_mays-49689     | BAB88215.1 Secretory acid phosphatase precursor [O. sativa]            | Signal transduction       |
| Non-pericycle | 43580523  | EH210902   | ZZ-De08.r   | PUT-155a-Zea_mays-49689     | BAB88215.1 Secretory acid phosphatase precursor [O. sativa]            | Signal transduction       |
| Non-pericycle | 43580440  | EH210819   | ZZ-Cf04.r   | PUT-155a-Zea_mays-30477739  | AAQ63461.1 Calmodulin 4 [D. carota]                                    | Signal transduction       |
| Non-pericycle | 43580266  | EH210645   | ZAe09.R     | PUT-155a-Zea_mays-20769     | BAD46198.1 Finger-containing phosphoinositide kinase-like [O. sativa]  | Signal transduction       |
| Non-pericycle | 43580436  | EH210815   | ZZ-Ch02.r   | PUT-155a-Zea_mays-12977736  | BAD26466.1 Non-phototropic hypocotyl 3 [O. sativa]                     | Signal transduction       |
| Non-pericycle | 43580468  | EH210847   | ZZ-Da02.r   | PUT-155a-Zea_mays-11677740  | AAR11450.1 Salt-induced MAP kinase 1 [Z. mays]                         | Signal transduction       |
| Non-pericycle | 43580481  | EH210860   | ZZ-Db03.r   | PUT-155a-Zea_mays-11677740  | AAR11450.1 Salt-induced MAP kinase 1 [Z. mays]                         | Signal transduction       |
| Non-pericycle | 43580496  | EH210875   | ZZ-Dc10.r   | PUT-155a-Zea_mays-03444     | BAB92346.1 Casein kinase I-like [O. sativa]                            | Signal transduction       |
| Non-pericycle | 43580506  | EH210885   | ZZ-Dd04.r   | PUT-155a-Zea_mays-03444     | BAB92346.1 Casein kinase I-like [O. sativa]                            | Signal transduction       |
| Non-pericycle | 43580401  | EH210780   | ZZ-Cc11.r   | PUT-155a-Zea_mays-018188    | AAC83393.1 protein kinase ZmMEK1 [Z. mays]                             | Signal transduction       |

| Cell-type     | db_EST ID | Genbank AC | In house ID | Anchoring                  | AC Function [species]                                                       | Functional category |
|---------------|-----------|------------|-------------|----------------------------|-----------------------------------------------------------------------------|---------------------|
| Non-pericycle | 43580489  | EH210868   | ZZ-Dc01.r   | PUT-155a-Zea_mays-013537   | AAR01743.1 Putative kinase interacting protein [O. sativa]                  | Signal transduction |
| Non-pericycle | 43580251  | EH210630   | ZAd06.R     | -                          | Q40787 Ras-related protein Rab7 [P. cilliaris]                              | Signal transduction |
| Non-pericycle | 43580542  | EH210921   | ZZ-Dg08.r   | -                          | AAT37528.1 Purple acid phosphatase 3 [S. tuberosum]                         | Signal transduction |
| Non-pericycle | 43580546  | EH210925   | ZZ-Dh10.r   | -                          | NP_171800.1 Protein binding / signal transducer [A. thaliana]               | Signal transduction |
| Non-pericycle | 43580291  | EH210670   | ZAg02.R     | PUT-155a-Zea_mays-72850    | AAX14637.1 Zinc finger protein [Z. mays]                                    | Transcription       |
| Non-pericycle | 43580472  | EH210851   | ZZ-Da08.r   | PUT-155a-Zea_mays-66742    | AAL50981.1 Zinc finger protein LSD1 [B. oleracea]                           | Transcription       |
| Non-pericycle | 43580302  | EH210681   | ZAh10.R     | PUT-155a-Zea_mays-65005    | ABF98871.1 PHD-finger family protein, expressed [O. sativa]                 | Transcription       |
| Non-pericycle | 43580305  | EH210684   | ZZ-Bd07.r   | PUT-155a-Zea_mays-30849    | ABA99388.2 CCAAT-box transcription factor complex WHAP5 [O. sativa]         | Transcription       |
| Non-pericycle | 43580427  | EH210806   | ZZ-Ce01.r   | PUT-155a-Zea_mays-25696    | ABF70104.1 DNA-directed RNA polymerase II 8.2 kDa polypept. [M. balbisiana] | Transcription       |
| Non-pericycle | 43580399  | EH210778   | ZZ-Cb07.r   | PUT-155a-Zea_mays-17730    | NP_188871.1 DNA binding / DNA-directed RNA polymerase [A. thaliana]         | Transcription       |
| Non-pericycle | 43580473  | EH210852   | ZZ-Da04.r   | PUT-155a-Zea_mays-1771     | CAL25342.1 Zinc-binding protein [Platanus x acerifolia]                     | Transcription       |
| Non-pericycle | 43580483  | EH210862   | ZZ-Db05.r   | PUT-155a-Zea_mays-16778    | ABB48027.2 Poly polymerase catalytic domain containing protein [O. sativa]  | Transcription       |
| Non-pericycle | 43580416  | EH210795   | ZZ-Cc08.r   | PUT-155a-Zea_mays-031788   | ABE89784.1 RNA polymerase subunit, RPB5 [M. truncatula]                     | Transcription       |
| Non-pericycle | 43580313  | EH210692   | ZZ-Ba04.r   | -                          | ABA99388.2 CCAAT-box transcription factor complex WHAP5 [O. sativa]         | Transcription       |
| Non-pericycle | 43580326  | EH210705   | ZZ-Bc02.r   | PUT-155a-Zea_mays-71822    | AAC09245.1 Tonoplast intrinsic protein; ZmTIP1 [Z. mays]                    | Transport           |
| Non-pericycle | 43580356  | EH210735   | ZZ-Bf01.r   | PUT-155a-Zea_mays-71750    | AAC09245.1 Tonoplast intrinsic protein; ZmTIP1 [Z. mays]                    | Transport           |
| Non-pericycle | 43580467  | EH210846   | ZZ-Da11.r   | PUT-155a-Zea_mays-26157    | AAO72686.1 Myosin heavy chain [O. sativa]                                   | Transport           |
| Non-pericycle | 43580374  | EH210753   | ZZ-Bh10.r   | PUT-155a-Zea_mays-24594    | NP_199841.2 Transporter [A. thaliana]                                       | Transport           |
| Non-pericycle | 43580346  | EH210725   | ZZ-Be02.r   | PUT-155a-Zea_mays-18005    | AAK26760.1 Plasma membrane integral protein ZmPIP2-3 [Z. mays]              | Transport           |
| Non-pericycle | 43580272  | EH210651   | ZAh07.R     | PUT-155a-Zea_mays-12177743 | AAK26768.1 Tonoplast membrane integral protein ZmTIP-2 [Z. mays]            | Transport           |
| Non-pericycle | 43580320  | EH210699   | ZZ-Bb10.r   | PUT-155a-Zea_mays-018690   | ABD28549.1 Dynamin GTPase effector [M. truncatula]                          | Transport           |
| Non-pericycle | 43580322  | EH210701   | ZZ-Bc09.r   | PUT-155a-Zea_mays-018690   | ABD28549.1 Dynamin GTPase effector [M. truncatula]                          | Transport           |
| Non-pericycle | 43580512  | EH210891   | ZZ-Dd10.r   | PUT-155a-Zea_mays-018690   | ABD28549.1 Dynamin GTPase effector [M. truncatula]                          | Transport           |
| Non-pericycle | 43580312  | EH210691   | ZZ-Ba06.r   | PUT-155a-Zea_mays-016721   | AAK91816.1 Kinesin heavy chain [Z. mays]                                    | Transport           |
| Non-pericycle | 43580403  | EH210782   | ZZ-Cb01.r   | PUT-155a-Zea_mays-016721   | AAK91816.1 Kinesin heavy chain [Z. mays]                                    | Transport           |
| Non-pericycle | 43580338  | EH210717   | ZZ-Bd09.r   | -                          | AAN64492.1 Calcium ATPase [O. sativa]                                       | Transport           |
| Non-pericycle | 43580477  | EH210856   | ZZ-Da10.r   | MAGI4_85080                | AAW57815.1 Polyprotein [O. sativa]                                          | Transposon          |
| Non-pericycle | 43580371  | EH210750   | ZZ-Bg12.r   | PUT-155a-Zea_mays-93077742 | NP_001050557.1 Unknown function [O. sativa]                                 | Unknown             |
| Non-pericycle | 43580432  | EH210811   | ZZ-Ce05.r   | PUT-155a-Zea_mays-76495    | NP_001057232.1 Unknown function [O. sativa]                                 | Unknown             |
| Non-pericycle | 43580298  | EH210677   | ZAh04.R     | PUT-155a-Zea_mays-74912    | ABB03718.1 Unknown function [S. bicolor]                                    | Unknown             |
| Non-pericycle | 43580241  | EH210620   | ZAa10.R     | PUT-155a-Zea_mays-73014    | BAD19903.1 Putative D-protein [O. sativa]                                   | Unknown             |
| Non-pericycle | 43580336  | EH210715   | ZZ-Be05.r   | PUT-155a-Zea_mays-71941    | NP_001063690.1 Unknown function [O. sativa]                                 | Unknown             |
| Non-pericycle | 43580259  | EH210638   | ZAd02.R     | PUT-155a-Zea_mays-71777743 | No database hit                                                             | Unknown             |
| Non-pericycle | 43580533  | EH210912   | ZZ-Dg02.r   | PUT-155a-Zea_mays-67097    | P25866 Ubiquitin-conjugating enzyme E2-17 kDa [T. aestivum]                 | Unknown             |
| Non-pericycle | 43580397  | EH210776   | ZZ-Ca07.r   | PUT-155a-Zea_mays-64706    | NP_565757.2 Unknown function [A. thaliana]                                  | Unknown             |
| Non-pericycle | 43580236  | EH210615   | ZAa07.R     | PUT-155a-Zea_mays-63899    | No database hit                                                             | Unknown             |
| Non-pericycle | 43580296  | EH210675   | ZZ-Bb03.r   | PUT-155a-Zea_mays-60763    | No database hit                                                             | Unknown             |
| Non-pericycle | 43580457  | EH210836   | ZZ-Ch04.r   | PUT-155a-Zea_mays-58787    | NP_001046496.1 Unknown function [O. sativa]                                 | Unknown             |
| Non-pericycle | 43580377  | EH210756   | ZZ-Ca01.r   | PUT-155a-Zea_mays-56344    | NP_001058932.1 Unknown function [O. sativa]                                 | Unknown             |
| Non-pericycle | 43580423  | EH210802   | ZZ-Cd10.r   | PUT-155a-Zea_mays-50373    | NP_001051549.1 Unknown function [O. sativa]                                 | Unknown             |
| Non-pericycle | 43580229  | EH210608   | ZAc02.R     | PUT-155a-Zea_mays-4825     | No database hit                                                             | Unknown             |
| Non-pericycle | 43580480  | EH210859   | ZZ-Db02.r   | PUT-155a-Zea_mays-47036    | NP_001043565.1 Unknown function [O. sativa]                                 | Unknown             |
| Non-pericycle | 43580501  | EH210880   | ZZ-Dd01.r   | PUT-155a-Zea_mays-47036    | NP_001043565.1 Unknown function [O. sativa]                                 | Unknown             |
| Non-pericycle | 43580419  | EH210798   | ZZ-Ce10.r   | PUT-155a-Zea_mays-46777737 | CAH67826.1 Unknown function [O. sativa]                                     | Unknown             |

| Cell-type     | db_EST ID | Genbank AC | In house ID | Anchoring                   | AC Function [species]                                                 | Functional category |
|---------------|-----------|------------|-------------|-----------------------------|-----------------------------------------------------------------------|---------------------|
| Non-pericycle | 43580530  | EH210909   | ZZ-Df11.r   | PUT-155a-Zea_mays-41798     | NP_001058402.1 Unknown function [O. sativa]                           | Unknown             |
| Non-pericycle | 43580540  | EH210919   | ZZ-Dh08.r   | PUT-155a-Zea_mays-41798     | NP_001058402.1 Unknown function [O. sativa]                           | Unknown             |
| Non-pericycle | 43580282  | EH210661   | ZAe12.R     | PUT-155a-Zea_mays-40243     | No database hit                                                       | Unknown             |
| Non-pericycle | 43580328  | EH210707   | ZZ-Bc04.r   | PUT-155a-Zea_mays-40243     | No database hit                                                       | Unknown             |
| Non-pericycle | 43580288  | EH210667   | ZZ-Bc08.r   | PUT-155a-Zea_mays-40243     | No database hit                                                       | Unknown             |
| Non-pericycle | 43580350  | EH210729   | ZZ-Be11.r   | PUT-155a-Zea_mays-40243     | No database hit                                                       | Unknown             |
| Non-pericycle | 43580361  | EH210740   | ZZ-Bf12.r   | PUT-155a-Zea_mays-40243     | No database hit                                                       | Unknown             |
| Non-pericycle | 43580421  | EH210800   | ZZ-Cd05.r   | PUT-155a-Zea_mays-40243     | No database hit                                                       | Unknown             |
| Non-pericycle | 43580422  | EH210801   | ZZ-Cd07.r   | PUT-155a-Zea_mays-40243     | No database hit                                                       | Unknown             |
| Non-pericycle | 43580461  | EH210840   | ZZ-Ch03.r   | PUT-155a-Zea_mays-40243     | No database hit                                                       | Unknown             |
| Non-pericycle | 43580335  | EH210714   | ZZ-Bc11.r   | PUT-155a-Zea_mays-38832     | NP_001062195.1 Unknown function [O. sativa]                           | Unknown             |
| Non-pericycle | 43580545  | EH210924   | ZZ-Dh07.r   | PUT-155a-Zea_mays-37898     | NP_001044596.1 Unknown function [O. sativa]                           | Unknown             |
| Non-pericycle | 43580430  | EH210809   | ZZ-Cg05.r   | PUT-155a-Zea_mays-3613      | BAD87032.1 HSV-1 stimulation-related 1-like [O. sativa]               | Unknown             |
| Non-pericycle | 43580495  | EH210874   | ZZ-Dc09.r   | PUT-155a-Zea_mays-36026     | NP_001051136.1 Unknown function [O. sativa]                           | Unknown             |
| Non-pericycle | 43580339  | EH210718   | ZZ-Be12.r   | PUT-155a-Zea_mays-33377736  | NP_001050926.1 Unknown function [O. sativa]                           | Unknown             |
| Non-pericycle | 43580277  | EH210656   | ZZ-Ba03.r   | PUT-155a-Zea_mays-25345     | NP_001064442.1 Unknown function [O. sativa]                           | Unknown             |
| Non-pericycle | 43580390  | EH210769   | ZZ-Cb06.r   | PUT-155a-Zea_mays-23742     | AAT76982.1 Unknown function [O. sativa]                               | Unknown             |
| Non-pericycle | 43580538  | EH210917   | ZZ-Dg10.r   | PUT-155a-Zea_mays-23531     | AAB61961.1 Integral membrane protein [O. sativa]                      | Unknown             |
| Non-pericycle | 43580500  | EH210879   | ZZ-Dd07.r   | PUT-155a-Zea_mays-23177736  | NP_001056580.1 Unknown function [O. sativa]                           | Unknown             |
| Non-pericycle | 43580543  | EH210922   | ZZ-Dh03.r   | PUT-155a-Zea_mays-22065     | AAR07596.1 Fiber protein Fb34 [G. barbadense]                         | Unknown             |
| Non-pericycle | 43580550  | EH210929   | ZZ-Dh09.r   | PUT-155a-Zea_mays-2076      | ABC01908.1 24 kDa seed maturation protein-like protein [S. tuberosum] | Unknown             |
| Non-pericycle | 43580539  | EH210918   | ZZ-Dg04.r   | PUT-155a-Zea_mays-126477740 | No database hit                                                       | Unknown             |
| Non-pericycle | 43580304  | EH210683   | ZAh05.R     | PUT-155a-Zea_mays-121277738 | NP_001045307.1 Unknown function [O. sativa]                           | Unknown             |
| Non-pericycle | 43580268  | EH210647   | ZAe07.R     | PUT-155a-Zea_mays-117477740 | No database hit                                                       | Unknown             |
| Non-pericycle | 43580442  | EH210821   | ZZ-Dc03.r   | PUT-155a-Zea_mays-117477740 | No database hit                                                       | Unknown             |
| Non-pericycle | 43580360  | EH210739   | ZZ-Bf10.r   | PUT-155a-Zea_mays-116477740 | CAC33802.1 Plasma membrane intrinsic protein [Z. mays]                | Unknown             |
| Non-pericycle | 43580466  | EH210845   | ZZ-Ch05.r   | PUT-155a-Zea_mays-112177740 | AAP53898.2 Unknown function [O. sativa]                               | Unknown             |
| Non-pericycle | 43580398  | EH210777   | ZZ-Cc02.r   | PUT-155a-Zea_mays-111477743 | No database hit                                                       | Unknown             |
| Non-pericycle | 43580412  | EH210791   | ZZ-Cd04.r   | PUT-155a-Zea_mays-111477743 | No database hit                                                       | Unknown             |
| Non-pericycle | 43580514  | EH210893   | ZZ-De05.r   | PUT-155a-Zea_mays-111477743 | No database hit                                                       | Unknown             |
| Non-pericycle | 43580317  | EH210696   | ZZ-Bd01.r   | PUT-155a-Zea_mays-104       | NP_001048413.1 Unknown function [O. sativa]                           | Unknown             |
| Non-pericycle | 43580348  | EH210727   | ZZ-Bd12.r   | PUT-155a-Zea_mays-100177735 | No database hit                                                       | Unknown             |
| Non-pericycle | 43580447  | EH210826   | ZZ-Cf12.r   | PUT-155a-Zea_mays-09961     | No database hit                                                       | Unknown             |
| Non-pericycle | 43580445  | EH210824   | ZZ-Cf02.r   | PUT-155a-Zea_mays-09234     | No database hit                                                       | Unknown             |
| Non-pericycle | 43580250  | EH210629   | ZAb12.R     | PUT-155a-Zea_mays-088711    | NP_001061393.1 Unknown function [O. sativa]                           | Unknown             |
| Non-pericycle | 43580297  | EH210676   | ZZ-Bb01.r   | PUT-155a-Zea_mays-08832     | NP_001042681.1 Unknown function [O. sativa]                           | Unknown             |
| Non-pericycle | 43580244  | EH210623   | ZAb05.R     | PUT-155a-Zea_mays-07560     | NP_001056574.1 Unknown function [O. sativa]                           | Unknown             |
| Non-pericycle | 43580452  | EH210831   | ZZ-Cf11.r   | PUT-155a-Zea_mays-071457    | NP_001047161.1 Unknown function [O. sativa]                           | Unknown             |
| Non-pericycle | 43580388  | EH210767   | ZZ-Bh09.r   | PUT-155a-Zea_mays-06917     | NP_001055871.1 Unknown function [O. sativa]                           | Unknown             |
| Non-pericycle | 43580509  | EH210888   | ZZ-De02.r   | PUT-155a-Zea_mays-061548    | No database hit                                                       | Unknown             |
| Non-pericycle | 43580318  | EH210697   | ZZ-Bb05.r   | PUT-155a-Zea_mays-04774     | NP_001062331.1 Unknown function [O. sativa]                           | Unknown             |
| Non-pericycle | 43580464  | EH210843   | ZZ-Ch07.r   | PUT-155a-Zea_mays-04153     | NP_566070.3 Arabinogalactan protein 16 [A. thaliana]                  | Unknown             |
| Non-pericycle | 43580513  | EH210892   | ZZ-De10.r   | PUT-155a-Zea_mays-032       | No database hit                                                       | Unknown             |
| Non-pericycle | 43580541  | EH210920   | ZZ-Dh04.r   | PUT-155a-Zea_mays-02588     | AAC31615.1 Physical impedance induced protein [Z. mays]               | Unknown             |



| Cell-type     | db_EST ID | Genbank AC | In house ID | Anchoring                | AC Function [species]                                   | Functional category |
|---------------|-----------|------------|-------------|--------------------------|---------------------------------------------------------|---------------------|
| Non-pericycle | 43580329  | EH210708   | ZZ-Bd04.r   | PUT-155a-Zea_mays-020050 | No database hit                                         | Unknown             |
| Non-pericycle | 43580334  | EH210713   | ZZ-Be08.r   | PUT-155a-Zea_mays-018803 | AAC31615.1 Physical impedance induced protein [Z. mays] | Unknown             |
| Non-pericycle | 43580373  | EH210752   | ZZ-Bg08.r   | PUT-155a-Zea_mays-018803 | AAC31615.1 Physical impedance induced protein [Z. mays] | Unknown             |
| Non-pericycle | 43580392  | EH210771   | ZZ-Ca09.r   | PUT-155a-Zea_mays-018803 | AAC31615.1 Physical impedance induced protein [Z. mays] | Unknown             |
| Non-pericycle | 43580487  | EH210866   | ZZ-Df08.r   | PUT-155a-Zea_mays-017772 | ABE98701.1 Hypothetical protein [Z. mays]               | Unknown             |
| Non-pericycle | 43580531  | EH210910   | ZZ-Df06.r   | PUT-155a-Zea_mays-017282 | NP_001047650.1 Unknown function [O. sativa]             | Unknown             |
| Non-pericycle | 43580233  | EH210612   | ZAd04.R     | PUT-155a-Zea_mays-014790 | BAD25464.1 Unknown function [O. sativa]                 | Unknown             |
| Non-pericycle | 43580286  | EH210665   | ZAf05.R     | PUT-155a-Zea_mays-014694 | ABG22358.1 Glycoprotein [O. sativa]                     | Unknown             |
| Non-pericycle | 43580333  | EH210712   | ZZ-Bd02.r   | PUT-155a-Zea_mays-014694 | ABG22358.1 Glycoprotein [O. sativa]                     | Unknown             |
| Non-pericycle | 43580406  | EH210785   | ZZ-Cg06.r   | PUT-155a-Zea_mays-013510 | ABA94971.2 Unknown function [O. sativa]                 | Unknown             |
| Non-pericycle | 43580425  | EH210804   | ZZ-Cd11.r   | PUT-155a-Zea_mays-010578 | No database hit                                         | Unknown             |
| Non-pericycle | 43580549  | EH210928   | ZZ-Dh12.r   | MAGI4_97173              | AAV43895.1 Unknown protein [O. sativa]                  | Unknown             |
| Non-pericycle | 43580275  | EH210654   | ZAg01.R     | MAGI4_82181              | AAX53160.1 YNR4 [O. sativa]                             | Unknown             |
| Non-pericycle | 43580311  | EH210690   | ZZ-Ba11.r   | MAGI4_42572              | NP_001067629.1 Unknown function [O. sativa]             | Unknown             |
| Non-pericycle | 43580325  | EH210704   | ZZ-Bb09.r   | MAGI4_42572              | NP_001067629.1 Unknown function [O. sativa]             | Unknown             |
| Non-pericycle | 43580366  | EH210745   | ZZ-Bh02.r   | MAGI4_16551              | No database hit                                         | Unknown             |
| Non-pericycle | 43580394  | EH210773   | ZZ-Ca05.r   | MAGI4_160800             | No database hit                                         | Unknown             |
| Non-pericycle | 43580234  | EH210613   | ZAa03.R     | MAGI4_147414             | No database hit                                         | Unknown             |
| Non-pericycle | 43580359  | EH210738   | ZZ-Bg01.r   | MAGI4_119046             | No database hit                                         | Unknown             |
| Non-pericycle | 43580238  | EH210617   | ZAa06.R     | -                        | No database hit                                         | Unknown             |
| Non-pericycle | 43580249  | EH210628   | ZAb11.R     | -                        | No database hit                                         | Unknown             |
| Non-pericycle | 43580245  | EH210624   | ZAd11.R     | -                        | No database hit                                         | Unknown             |
| Non-pericycle | 43580265  | EH210644   | ZAf09.R     | -                        | No database hit                                         | Unknown             |
| Non-pericycle | 43580284  | EH210663   | ZAf10.R     | -                        | No database hit                                         | Unknown             |
| Non-pericycle | 43580285  | EH210664   | ZAg08.R     | -                        | No database hit                                         | Unknown             |
| Non-pericycle | 43580273  | EH210652   | ZAg09.R     | -                        | No database hit                                         | Unknown             |
| Non-pericycle | 43580299  | EH210678   | ZZ-Ba10.r   | -                        | No database hit                                         | Unknown             |
| Non-pericycle | 43580354  | EH210733   | ZZ-Bf02.r   | -                        | No database hit                                         | Unknown             |
| Non-pericycle | 43580362  | EH210741   | ZZ-Bf03.r   | -                        | No database hit                                         | Unknown             |
| Non-pericycle | 43580379  | EH210758   | ZZ-Bh01.r   | -                        | No database hit                                         | Unknown             |
| Non-pericycle | 43580433  | EH210812   | ZZ-Ce03.r   | -                        | No database hit                                         | Unknown             |
| Non-pericycle | 43580453  | EH210832   | ZZ-Cg07.r   | -                        | No database hit                                         | Unknown             |
| Non-pericycle | 43580463  | EH210842   | ZZ-Ch09.r   | -                        | No database hit                                         | Unknown             |
| Non-pericycle | 43580460  | EH210839   | ZZ-Da05.r   | -                        | No database hit                                         | Unknown             |
| Non-pericycle | 43580474  | EH210853   | ZZ-Da12.r   | -                        | No database hit                                         | Unknown             |
| Non-pericycle | 43580484  | EH210863   | ZZ-Db07.r   | -                        | No database hit                                         | Unknown             |
| Non-pericycle | 43580494  | EH210873   | ZZ-Dc07.r   | -                        | No database hit                                         | Unknown             |
| Non-pericycle | 43580502  | EH210881   | ZZ-Dc12.r   | -                        | No database hit                                         | Unknown             |
| Non-pericycle | 43580499  | EH210878   | ZZ-Dd09.r   | -                        | No database hit                                         | Unknown             |
| Non-pericycle | 43580526  | EH210905   | ZZ-Df07.r   | -                        | No database hit                                         | Unknown             |
| Non-pericycle | 43580497  | EH210876   | ZZ-Dg05.r   | -                        | NP_001066378.1 Unknown function [O. sativa]             | Unknown             |

**Online supplement 3:** Peptide sequences and peptide Mascot scores of Proteins from Table 4.

| Spot No. <sup>a</sup> | Protein [ <i>Species</i> ] AC <sup>b</sup>                        | Peptides <sup>c</sup>                   | Position <sup>d</sup> | Mascot score <sup>e</sup> |
|-----------------------|-------------------------------------------------------------------|-----------------------------------------|-----------------------|---------------------------|
| 1                     | Methionine synthase [ <i>Z. mays</i> ] AAL33589                   | YLFAGVVDGR                              | 288 - 297             | 45                        |
|                       |                                                                   | IPSAEEIADR                              | 706 - 715             | 33                        |
|                       |                                                                   | YTEVKPALTNM <sup>Ox</sup> VSAAK         | 741 - 756             | 12                        |
| 2                     | Phenylalanine ammonia-lyase [ <i>Z. mays</i> ] AAL40137           | VGQVAAVASAK                             | 51 - 61               | 20                        |
|                       |                                                                   | KVDAAEAFK                               | 218 - 226             | 21                        |
|                       |                                                                   | NPSLDYGFK                               | 435 - 443             | 36                        |
| 3                     | Adenosylhomocysteinase-like protein [ <i>O. sativa</i> ] AAO72664 | VKDLSQADFGR                             | 16 - 26               | 59                        |
|                       |                                                                   | LVGVSEETTTGVKR                          | 199 - 212             | 93                        |
|                       |                                                                   | LVGVSEETTTGVK                           | 199 - 211             | 51                        |
|                       |                                                                   | HSLPDGLM <sup>Ox</sup> R                | 246 - 254             | 17                        |
|                       |                                                                   | ATDVM <sup>Ox</sup> IAGK                | 255 - 263             | 15                        |
|                       |                                                                   | DIIM <sup>Ox</sup> VDHM <sup>Ox</sup> R | 329 - 337             | 29                        |
|                       |                                                                   | ITIKPQTDR                               | 369 - 377             | 32                        |

| Spot No. <sup>a</sup> | Protein [ <i>Species</i> ] AC <sup>b</sup>   | Peptides <sup>c</sup>      | Position <sup>d</sup> | Mascot score <sup>e</sup> |
|-----------------------|----------------------------------------------|----------------------------|-----------------------|---------------------------|
| 4                     | ATPase subunit 1 [ <i>Z. mays</i> ] ABE98710 | AAELTTLESR                 | 7 - 17                | 49                        |
|                       |                                              | VVSVGDGIAR                 | 33 - 42               | 41                        |
|                       |                                              | TGSIVDVPAGK                | 93 - 103              | 22                        |
|                       |                                              | VVDALGVPIDGK               | 109 - 120             | 37                        |
|                       |                                              | AVDSLVPIGR                 | 154 - 163             | 29                        |
|                       |                                              | ELIIGDR                    | 167 - 173             | 26                        |
| 5                     | Actin [ <i>S. officinarum</i> ] AAU93346     | DAYVGDEAQSKR               | 53 - 64               | 25                        |
|                       |                                              | GYSFTTSAER                 | 199 - 208             | 38                        |
|                       |                                              | EITSLAPSSM <sup>Ox</sup> K | 318 - 328             | 13                        |
|                       |                                              | EEYDESGPAIVHR              | 362 - 374             | 94                        |

| Spot No. <sup>a</sup> | Protein [ <i>Species</i> ] AC <sup>b</sup>                      | Peptides <sup>c</sup>                       | Position <sup>d</sup> | Mascot score <sup>e</sup> |
|-----------------------|-----------------------------------------------------------------|---------------------------------------------|-----------------------|---------------------------|
| 6                     | S-adenosylmethionine synthetase [ <i>O. sativa</i> ] AAT94053   | TNM <sup>Ox</sup> VM <sup>Ox</sup> VFGEITTK | 46 - 58               | 38                        |
|                       |                                                                 | TQVTVEYR                                    | 168 - 175             | 46                        |
|                       |                                                                 | TIFHLNPSGR                                  | 226 - 235             | 45                        |
|                       |                                                                 | FVIGGPHGDAGLTGR                             | 236 - 250             | 23                        |
|                       |                                                                 | SIVASGLAR                                   | 290 - 298             | 29                        |
|                       |                                                                 | TAAYGHFGR                                   | 363 - 371             | 52                        |
| 7                     | Cytosolic 3-phosphoglycerate kinase [ <i>Z. mays</i> ] AAO32644 | YSLKPLVPR                                   | 1 - 9                 | 50                        |
|                       |                                                                 | ELDYLVGAVANPK                               | 105 - 117             | 54                        |
|                       |                                                                 | KPFAAIVGGSK                                 | 118 - 128             | 84                        |
|                       |                                                                 | IGVIESLLAK                                  | 133 - 142             | 58                        |
|                       |                                                                 | FAAGTEIAIK                                  | 258 - 267             | 58                        |
|                       |                                                                 | KLAELTTTK                                   | 268 - 276             | 61                        |
|                       |                                                                 | LAELTTTK                                    | 269 - 276             | 49                        |
|                       |                                                                 | GVTTIIGGDSVAAVEK                            | 277 - 293             | 50                        |

| Spot No. <sup>a</sup> | Protein [ <i>Species</i> ] AC <sup>b</sup>                               | Peptides <sup>c</sup>       | Position <sup>d</sup> | Mascot score <sup>e</sup> |
|-----------------------|--------------------------------------------------------------------------|-----------------------------|-----------------------|---------------------------|
| 8                     | Glutamate dehydrogenase [ <i>Z. mays</i> ] AAB51596                      | TAVANIPYGGAK                | 91 - 102              | 28                        |
|                       |                                                                          | VIAISDVTGAVK                | 232 - 243             | 63                        |
|                       |                                                                          | M <sup>Ox</sup> GAFTLGVNR   | 390 - 399             | 56                        |
| 9                     | Alpha-1,4-glucan-protein synthase [ <i>Z. mays</i> ] P80607              | C <sup>COMe</sup> FGYMVSK   | 95 - 102              | 2                         |
|                       |                                                                          | DINALEQHIK                  | 123 - 132             | 50                        |
|                       |                                                                          | GYPFSLR                     | 159 - 165             | 18                        |
|                       |                                                                          | YVDAVM <sup>Ox</sup> TIPK   | 199 - 208             | 20                        |
|                       |                                                                          | ASNPFVNLK                   | 276 - 284             | 48                        |
|                       |                                                                          | C <sup>COMe</sup> YIYLSGQVK | 315 - 324             | 32                        |
|                       |                                                                          | LGTIDPYFVK                  | 327 - 336             | 40                        |
| 10                    | Alpha-1,4-glucan-protein synthase (Amylogenin) [ <i>Z. mays</i> ] P80607 | DINALEQHIK                  | 123 - 132             | 24                        |
|                       |                                                                          | GYPFSLR                     | 159 - 165             | 9                         |
|                       |                                                                          | ASNPFVNLK                   | 276 - 284             | 29                        |
|                       |                                                                          | CYIYLSGQVK                  | 315 - 324             | 7                         |

| Spot No. <sup>a</sup> | Protein [ <i>Species</i> ] AC <sup>b</sup>                                      | Peptides <sup>c</sup>        | Position <sup>d</sup> | Mascot score <sup>e</sup> |
|-----------------------|---------------------------------------------------------------------------------|------------------------------|-----------------------|---------------------------|
| 11                    | Glyceraldehyde-3-phosphate dehydrogenase, cytosolic 2 [ <i>Z. mays</i> ] Q09054 | YDTVHGQWK                    | 49 - 57               | 37                        |
|                       |                                                                                 | HSDIALKDSK                   | 58 - 67               | 28                        |
|                       |                                                                                 | KVVISAPSK                    | 120 - 128             | 43                        |
|                       |                                                                                 | AASFNIIPSSTGAAK              | 203 - 217             | 11                        |
|                       |                                                                                 | GASYEEIKK                    | 254 - 262             | 8                         |
| 12                    | Glyceraldehyde-3-phosphate dehydrogenase [ <i>Z. mays</i> ] AAA33466            | KVVISAPSK                    | 30 - 38               | 44                        |
|                       |                                                                                 | DAPMFVVGVNEDK                | 39 - 51               | 13                        |
|                       |                                                                                 | AASFNIIPSSTGAAK              | 113 - 127             | 9                         |
|                       |                                                                                 | GASYEEIKK                    | 164 - 172             | 42                        |
|                       |                                                                                 | AGIALNDHFIK                  | 211 - 221             | 48                        |
| 13                    | Glyceraldehyde-3-phosphate dehydrogenase, cytosolic 2 [ <i>Z. mays</i> ] Q09054 | IGINGFGR                     | 6 - 13                | 47                        |
|                       |                                                                                 | KVVISAPSK                    | 120 - 128             | 33                        |
|                       |                                                                                 | DAPM <sup>Ox</sup> FVVGVNEDK | 129 - 141             | 37                        |
|                       |                                                                                 | AASFNIIPSSTGAAK              | 203 - 217             | 38                        |
|                       |                                                                                 | AGIALNDHFIK                  | 301 - 311             | 48                        |

| Spot No. <sup>a</sup> | Protein [ <i>Species</i> ] AC <sup>b</sup>                                      | Peptides <sup>c</sup>       | Position <sup>d</sup> | Mascot score <sup>e</sup> |
|-----------------------|---------------------------------------------------------------------------------|-----------------------------|-----------------------|---------------------------|
| 14                    | Glyceraldehyde-3-phosphate dehydrogenase, cytosolic 3 [ <i>Z. mays</i> ] Q43247 | IGINGFGR                    | 6 - 13                | 49                        |
|                       |                                                                                 | KVVISAPSK                   | 120 - 128             | 74                        |
|                       |                                                                                 | DAPM <sup>Ox</sup> FVVGVNEK | 129 - 140             | 56                        |
|                       |                                                                                 | AASFNIIPSSTGAAK             | 203 - 217             | 26                        |
|                       |                                                                                 | SATYDEIK                    | 254 - 261             | 30                        |
|                       |                                                                                 | AGIALNGNFVK                 | 301 - 311             | 20                        |
| 15                    | Os05g0552300 [ <i>O. sativa</i> ] NP_001056254                                  | DVLSVAFSVDNR                | 120 - 131             | 61                        |
|                       |                                                                                 | LWNTLGEC <sup>COMe</sup> K  | 144 - 152             | 15                        |
|                       |                                                                                 | VWNLTNC <sup>COMe</sup> K   | 194 - 201             | 23                        |
|                       |                                                                                 | IWDLESK                     | 276 - 282             | 30                        |

| Spot No. <sup>a</sup> | Protein [ <i>Species</i> ] AC <sup>b</sup>                      | Peptides <sup>c</sup>    | Position <sup>d</sup> | Mascot score <sup>e</sup> |
|-----------------------|-----------------------------------------------------------------|--------------------------|-----------------------|---------------------------|
| 16                    | Glutathione S-transferase I (GST-29) [ <i>Z. mays</i> ] P12653  | SPEHLVR                  | 43 - 49               | 54                        |
|                       |                                                                 | KNKPELLR                 | 78 - 85               | 27                        |
|                       |                                                                 | NKPELLR                  | 79 - 85               | 18                        |
|                       |                                                                 | KVLEVYEAR                | 141 - 149             | 47                        |
|                       |                                                                 | VLEVYEAR                 | 142 - 149             | 62                        |
|                       |                                                                 | VAALM <sup>ox</sup> KPSA | 206 - 214             | 43                        |
| 17                    | Glutathione S-transferase IV (GST-27) [ <i>Z. mays</i> ] P46420 | HKPELLGGGR               | 81 - 90               | 25                        |
|                       |                                                                 | NQAVVDENVEK              | 130 - 140             | 45                        |
|                       |                                                                 | KVLEVYEAR                | 143 - 151             | 42                        |
|                       |                                                                 | VLEVYEAR                 | 144 - 151             | 61                        |
| 18                    | 1-Cys peroxiredoxin antioxidant [ <i>Z. mays</i> ] ABD24377     | VTFPILADPAR              | 102 - 112             | 8                         |
|                       |                                                                 | ALHVVGPKD                | 137 - 145             | 33                        |
|                       |                                                                 | LSFLYPATTGR              | 149 - 159             | 15                        |
|                       |                                                                 | AVDSSLTAAK               | 167 - 176             | 27                        |



| Spot No. <sup>a</sup> | Protein [ <i>Species</i> ] AC <sup>b</sup>                     | Peptides <sup>c</sup>       | Position <sup>d</sup> | Mascot score <sup>e</sup> |
|-----------------------|----------------------------------------------------------------|-----------------------------|-----------------------|---------------------------|
| 19                    | Pathogenesis-related protein 10 [ <i>Z. mays</i> ] AAY29574    | AAVM <sup>Ox</sup> DWHTLAPK | 23 - 34               | 29                        |
|                       |                                                                | LLPGVEVKDEIAK               | 124 - 136             | 47                        |
|                       |                                                                | AKESVTAIFK                  | 137 - 146             | 58                        |
| 20                    | Nucleoside diphosphate kinase [ <i>S. officinarum</i> ] P93554 | GLIGEISR                    | 16 - 24               | 73                        |
|                       |                                                                | GDFAVDIGR                   | 103 - 111             | 59                        |
|                       |                                                                | NVIHGSDSIESANK              | 112 - 125             | 52                        |

<sup>a</sup> Spot numbers as indicated on Fig. 2.

<sup>b</sup> Identified proteins obtained via automated algorithm of the mascot software ([www.matrixscience.com](http://www.matrixscience.com)) from the NCBI.nr database.

<sup>c</sup> Sequences of peptide fragments identified via ESI MS/MS. Modifications: Carbamidomethyl (C): COMe; Oxidation (M): Ox.

<sup>d</sup> Position of peptide fragments in full length proteins.

<sup>e</sup> Mascot score of individual peptide fragments. Addition of individual mascot scores of a protein leads to the protein mascot score indicated in Tab. 4.
